# Supplementary material for: Risk of hospital admission with coronavirus disease 2019 in healthcare workers and their households: nationwide linkage cohort study
Source: PubMed Central journal article supplement (PMC7591828; doi:10.1136/bmj.m3582), 2020-10-28
Supplement: shaa060836.ww1.pdf [file shaa060836.ww1.pdf]

## SUPPLEMENTARY MATERIAL

# **Risk of hospitalization with coronavirus disease 2019 in healthcare workers and their household members: a nationwide linkage cohort study**

Shah ASV<sup>1,2</sup>, Wood R<sup>3,4</sup>, Gribben C<sup>3</sup>, Caldwell D<sup>3</sup>, Bishop J<sup>3</sup>, Weir A<sup>3</sup>, Kennedy S<sup>3</sup>, Martin R<sup>3</sup>, Smith-Palmer A<sup>3</sup>, Goldberg D<sup>3</sup>, McMenamin J<sup>3</sup>, Fischbacher C<sup>3</sup>, Robertson C<sup>3</sup>, Hutchinson S<sup>3,5</sup>, McKeigue P<sup>6</sup>, Colhoun H<sup>3,7</sup>, McAllister DA<sup>3,8</sup>

1. Non-communicable Disease Epidemiology, London School of Hygiene and Tropical Medicine, London, UK.
2. Department of cardiology, Imperial College NHS Trust
3. Public Health Scotland, Edinburgh, UK.
4. Centre for Population Health Sciences, University of Edinburgh
5. School of Health and Life Sciences, Glasgow Caledonian University, Glasgow, UK.
6. MRC Institute of Genetics & Molecular Medicine, University of Edinburgh, Edinburgh, UK.
7. Usher Institute, University of Edinburgh, Edinburgh, UK.
8. Institute of Health and Wellbeing, University of Glasgow, Glasgow, UK.

### **Correspondence and requests for reprints:**

Dr David McAllister  
Institute of health and well being  
University of Glasgow,  
Glasgow  
United Kingdom  
E-mail: [david.mcallister@glasgow.ac.uk](mailto:david.mcallister@glasgow.ac.uk)

All analyses code is available at our github repository.

## ***Appendix 1***

### ***Descriptions and sources of national databases used for individual patient level linkage***

#### **Scottish hospitalization record from SMR01**

Comorbidities were defined using the Scottish morbidity record 01 (SMR01) - General/Acute Inpatient & Day Case. SMR01 an episode-based patient record relating to all inpatients and day cases discharged from non-obstetric and non-psychiatric specialties. A record is generated when a patient completes an episode of inpatient or day case care. Data collected include patient identifiable and demographic details, episode management details and general clinical information. Currently diagnoses are recorded using the ICD-10 classification and operations are recorded using the OPCS-4 classification. Further information on the national dataset and variables contained is available at <https://www.ndc.scot.nhs.uk/Data-Dictionary/SMR-Datasets/Episode-Management/SMR-Record-Type/>

#### **National Records of Scotland (NRS)**

The NRS covers all deaths in Scotland with approximately 55,000 deaths registered annually. The National Records of Scotland Death Records are linked with the NHS Scotland Scottish Morbidity Database which links together NHS Scotland inpatient, mental health and cancer registry datasets with the NRS Death Records. NRS records death status, cause of death and date of death.

Further information of the NRS death registry is available at <https://www.ndc.scot.nhs.uk/National-Datasets/data.asp?SubID=13>

#### **Prescribing Information System (PIS)**

The Prescribing Information System (PIS) is the definitive data source for all prescribing relating to all medicines and their costs that are prescribed and dispensed in the community in Scotland. The information is supplied by Practitioner & Counter Fraud Services Division (P&CFS) who is responsible for the processing and pricing of all prescriptions dispensed in Scotland. Primary care physicians write the vast majority of these prescriptions, with the remainder written by other authorised prescribers such as nurses and dentists. Also included in the dataset are prescriptions written in hospitals that are dispensed in the community. Note that prescriptions dispensed within hospitals are not included.

Further information on the Prescribing Information System operational in Scotland is available at <https://www.ndc.scot.nhs.uk/National-Datasets/data.asp?SubID=9>

#### **National microbiology register (Electronic Communication of Surveillance in Scotland [ECOSS])**

The Scottish microbiology surveillance registry, or ‘*Electronic Communication of Surveillance in Scotland*’ (ECOSS) as it is termed by NHS National Services Scotland, was used in the present study to provide individual patient-level data on SARS-Cov-2 testing and results. ECOSS is part of NHS Scotland’s Infection Intelligence Platform (IIP),<sup>1,2</sup> which was

set-up in response to the UK's antimicrobial resistance (AMR) strategy (2013-2018) with the aim of providing “*better access to and use of surveillance data*”.<sup>3</sup>

Data were first collected and recorded within ECOSS in 2007. The dataset is maintained by NHS National Services Scotland on behalf of Public Health Scotland (formerly Health Protection Scotland). ECOSS is updated monthly and, as of 2017, it contained approximately 29 million records of positive microbiology laboratory specimens from across Scotland.<sup>1</sup> It provides data for numerous national clinical and research activities, audit projects and Scottish Government reports, including: the identification of cases of severe infectious disease, infectious disease outbreaks and the evaluation of longer term trends in the incidence of laboratory-reported infections; surveillance of episodes of *Clostridium difficile* infections, *Escherichia coli* bacteraemia, *Staphylococcus aureus* bacteraemia and surgical site infections.<sup>2</sup> NHS National Services Scotland monitors the completeness and accuracy of ECOSS data through its ‘Data Monitoring and Support Service’.<sup>1</sup> Further, NHS National Services Scotland routinely informs data users of any problems affecting the accuracy or assurance of these data.

More information on the ECOSS data system is available at <https://www.hps.scot.nhs.uk/data/>

### **Scottish Workforce Information Standard System (SWISS)**

The Scottish Workforce Information Standard System (SWISS) is a national human resources database held by NHS Education Scotland which contains data on all directly employed staff (ie not contracted staff such as general practitioners except where they are also directly employed in some other role) working in the NHS in Scotland. It includes data for territorial health boards, and boards providing a national service. It records the job title using a nationally agreed standard as well as, for medical and dental staff the medical specialty. It also includes data on occupation grade, part-time/whole time status, and the designated service area.

More information on the SWISS database is available at <https://turasdata.nes.nhs.scot/media/2prjxbg4/2020-06-02-workforce-report.pdf>.

### **General Practitioner Contractor Database (GPCD)**

The General Practitioner Contractor Database (GPCD) includes all contracted general practitioners working in Scotland. This includes GP partners who are independent contractors, and salaried GPs, but not locum GPs. GOs in training grades are employed centrally and so are included in SWISS.

More information on the GPCD database is available at <https://www.isdscotland.org/Health-Topics/General-Practice/Workforce-and-Practice-Populations/>.

### **Rapid preliminary inpatient data (RAPID)**

The RAPID database has been operational since to 2001 to monitor and predict emergency admissions and bed occupancy across National Health Service Boards in Scotland. Data from this database has already been used to provide information to NHS boards, healthcare workers and the public on the direct and indirect effects of the COVID-19 pandemic. These

dashboards can be found at: <https://publichealthscotland.scot/our-areas-of-work/sharing-our-data-and-intelligence/coronavirus-covid-19-data/>

In 2015 the data collection was expanded to include data items on individual patient level data on age, sex, times of admission and discharge, ward significant facility, diagnosis and operation codes and information on patient discharge.

Further information on the RAPID databases can be found here:

<https://www.ndc.scot.nhs.uk/National-Datasets/data.asp?ID=1&SubID=37>

## References

1. Bennie M, Malcolm W, Marwick CA, Kavanagh K, Sneddon J, Nathwani D. Building a national Infection Intelligence Platform to improve antimicrobial stewardship and drive better patient outcomes: the Scottish experience. *J Antimicrob Chemother.* 2017 Oct 1;72(10):2938-42.
2. NHS National Services Scotland (NSS), 2014. Infection Intelligence Platform (IIP)- High level guide to IIP component datasets held by NHS National Services Scotland, <https://www.isdscotland.org/Health-Topics/Health-and-Social-Community-Care/Infection-Intelligence-Platform/Data/June-2014-Guide-to-IIP-Data.pdf> (accessed 18<sup>th</sup> March, 2020)
3. Scottish Government, 2014. Scottish Management of Antimicrobial Resistance Action Plan 2014-2018. <http://www.gov.scot/Publications/2014/07/9192> (accessed 2<sup>nd</sup> March, 2020)

## Appendix 2

The following tables show the exclusions from the Scottish Workforce Information Standard System (SWISS) and General Practitioner Contractor Database (GPCD), and their linkage to the Community Health Index (CHI) database. Note that paediatric staff were excluded where they *exclusively* worked in paediatrics.

### Medical staff on SWISS database

|                                            |        |
|--------------------------------------------|--------|
| Selection of medical and dental from SWISS | 16,499 |
| Drop staff where the grades clash          | 16,433 |
| Drop implausible specialty combinations    | 16,402 |
| Drop medical directors                     | 16,379 |
| Drop GPs in non-training grades            | 15,807 |
| Drop where there is no specialty data      | 14,421 |
| Final medical dataset                      | 14,421 |

### Non-medical staff on SWISS database

|             |         |
|-------------|---------|
| Non-medical | 150,131 |
|-------------|---------|

### Combined staff on SWISS database

|                                                  |         |
|--------------------------------------------------|---------|
| Non-medical and medical                          | 164,552 |
| Not in both medical and non-medical (one person) | 164,550 |
| Match in CHI database                            | 162,945 |
| Match in CHI database non-medical                | 148,930 |
| Match in CHI database medical                    | 14,015  |

### General Practice Contractor Database

|                                                                       |       |
|-----------------------------------------------------------------------|-------|
| General practice doctors                                              | 5,043 |
| Not in medical or non-medical SWISS database                          | 4,378 |
| Of above, those which are household members of medical or non-medical | 596   |

### GPCD and SWISS

|                                                                      |         |
|----------------------------------------------------------------------|---------|
| General practice doctors and medical and non-medical (162945 + 4378) | 167,323 |
| Exclude dental and paediatric*                                       | 160,971 |
| Exclude aged <18 or >65                                              | 158,445 |

*\* Dental healthcare workers were excluded from all analyses because only a small proportion of the dental workforce is captured in the SWISS database and the majority of dental services were closed during the COVID-19 pandemic. Paediatric healthcare workers were excluded because children differ from adults in their propensity to transmit COVID-19 infection and, compared to the 160,971 NHS staff in Scotland, there were comparatively few staff solely working in paediatric roles.*

***Appendix 3: Definitions used to categorize healthcare workers and list of specialties, job roles and service areas by categorization***

These tables are also available in machine readable formats in our public-facing github repository (<https://github.com/ChronicDiseaseEpi/hcw>).

*Definition of categorization for patient and non-patient facing and undetermined healthcare workers*

| Definition          | Description                                                                                              | Definition                                                                 |
|---------------------|----------------------------------------------------------------------------------------------------------|----------------------------------------------------------------------------|
| Any staff           | Any member of NHS staff.                                                                                 | Included in SWISS or GPCD database                                         |
| Patient facing, any | Include if likely to currently be working in patient-facing role.                                        | Specific list of AFC roles and/or medical specialties (see below)          |
| Non-patient-facing  | Any member of NHS staff likely to be in a non-patient-facing role.                                       | Specific list of AFC roles and/or medical specialties (see below)          |
| Undetermined        | Staff where it is not possible to allocate with confidence to patient-facing or non-patient-facing roles | Any staff not in “Patient-facing, any” or “Non-patient-facing” (see below) |

Definition of categorization for patient facing roles into those at front door, exposed to aerosolized generating procedures (AGP), in intensive care and other

| Definition                          | Description                                                                                                                                                                     | Definition*                                                                                       | Comparator(s)         |
|-------------------------------------|---------------------------------------------------------------------------------------------------------------------------------------------------------------------------------|---------------------------------------------------------------------------------------------------|-----------------------|
| Patient-facing, front-door COVID19  | Include if involved in acute medical receiving of patients with possible or probable COVID19 (ie not incidental finding such as COVID19 in patient with myocardial infarction). | Specific list of AFC roles and/or medical specialties and/or designated service area (see below). | Patient-facing, other |
| Patient-facing, Intensive care      | Intensive care medicine and anaesthetic specialties                                                                                                                             | Specific list of AFC roles and/or medical specialties and/or designated service area (see below). | Patient-facing, other |
| Patient-facing, Resp-oral-nasal-AGP | Include if involved in work with high risk of exposure to oral, nasal or respiratory secretions and/or aerosol generating procedures (AGP) outwith intensive care settings.     | Specific list of AFC roles and/or medical specialties and/or designated service area (see below). | Patient-facing, other |
| Patient-facing, other               | Patient-facing role but not front-door COVID or resp-oral-nasal-AGP or intensive care.                                                                                          | Patient-facing role but not front-door COVID or resp-oral-nasal-AGP or intensive care.            |                       |

\*Nursing staff in the General Acute Nursing and Specialist Nursing and have been further assigned to specific roles according to the recorded service area. This was done for the following territorial Health Boards, in whom there is  $\geq 95\%$  completeness for the service area variable: - NHS Ayrshire & Arran, NHS Borders, NHS Dumfries & Galloway, NHS Forth Valley, NHS Grampian, NHS Greater Glasgow & Clyde, NHS Highland, NHS Orkney and NHS Shetland. The remaining territorial boards had lower completeness for service area (ranging from 91% to  $<1\%$ )

*Definition of medical specialties into patient facing and non-patient facing roles\**

|                                          | Non patient-facing | Patient-facing** |            |                     |                |
|------------------------------------------|--------------------|------------------|------------|---------------------|----------------|
|                                          |                    | Any              | Front-door | Resp-oral-nasal-AGP | Intensive care |
| Acute Internal Medicine                  |                    | Yes              | Yes        |                     |                |
| Allergy                                  |                    |                  |            |                     |                |
| Anaesthetics                             |                    | Yes              |            |                     | Yes            |
| Audio Vestibular Medicine                |                    |                  |            |                     |                |
| Audiological Medicine                    |                    |                  |            |                     |                |
| Blood Transfusion                        |                    |                  |            |                     |                |
| Breast Screening Service                 |                    |                  |            |                     |                |
| Cardiology                               |                    | Yes              |            |                     |                |
| Cardiothoracic Surgery                   |                    | Yes              |            |                     |                |
| Chemical Pathology                       |                    |                  |            |                     |                |
| Clinical Genetics                        |                    |                  |            |                     |                |
| Clinical Neurophysiology                 |                    |                  |            |                     |                |
| Clinical Oncology                        |                    | Yes              |            |                     |                |
| Clinical Pharmacology and Therapeutics   |                    | Yes              |            |                     |                |
| Clinical Radiology                       |                    |                  |            |                     |                |
| Community Psychiatry                     |                    | Yes              |            |                     |                |
| Community Sexual And Reproductive Health |                    | Yes              |            |                     |                |
| Dermatology                              |                    |                  |            |                     |                |
| Diagnostic Neuropathology                | Yes                |                  |            |                     |                |
| Emergency Medicine                       |                    | Yes              | Yes        |                     |                |
| Endocrinology and Diabetes               |                    | Yes              |            |                     |                |
| Endodontics                              |                    | Yes              |            | Yes                 |                |
| Ent Surgery                              |                    | Yes              |            | Yes                 |                |
| Family Planning Service                  |                    |                  |            |                     |                |
| Fixed & Removable Prosthodontics         |                    |                  |            |                     |                |
| Forensic Histopathology                  | Yes                |                  |            |                     |                |
| Forensic Psychiatry                      |                    |                  |            |                     |                |
| Gastroenterology                         |                    | Yes              |            |                     |                |
| General (Internal) Medicine              |                    | Yes              | Yes        |                     |                |
| General Psychiatry                       |                    | Yes              |            |                     |                |
| General Surgery                          |                    | Yes              |            |                     |                |
| Genito-Urinary Medicine                  |                    | Yes              |            |                     |                |
| Geriatric Medicine                       |                    | Yes              | Yes        |                     |                |
| GP Other Than Obstetrics                 |                    | Yes              |            |                     |                |



|                                   |     |     |     |     |     |
|-----------------------------------|-----|-----|-----|-----|-----|
| Haematology                       |     |     |     |     |     |
| Histopathology                    | Yes |     |     |     |     |
| Homeopathy                        |     |     |     |     |     |
| Immunology                        |     |     |     |     |     |
| Infectious Diseases               |     | Yes | Yes |     |     |
| Intensive Care Medicine           |     | Yes |     |     | Yes |
| Medical Microbiology And Virology |     |     |     |     |     |
| Medical Oncology                  |     | Yes |     |     |     |
| Medical Ophthalmology             |     | Yes |     |     |     |
| Microbiology                      |     |     |     |     |     |
| Neurology                         |     | Yes |     |     |     |
| Neurosurgery                      |     | Yes |     |     |     |
| Nuclear Medicine                  |     |     |     |     |     |
| Obstetrics And Gynaecology        |     | Yes |     |     |     |
| Occupational Medicine             |     | Yes |     |     |     |
| Old Age Psychiatry                |     | Yes |     |     |     |
| Ophthalmology                     |     | Yes |     |     |     |
| Oral And Maxillofacial Surgery    |     | Yes |     | Yes |     |
| Oral And Maxillofacial Pathology  | Yes |     |     |     |     |
| Oral Medicine                     |     | Yes |     | Yes |     |
| Oral Microbiology                 |     |     |     |     |     |
| Oral Pathology                    |     |     |     |     |     |
| Oral Surgery                      |     | Yes |     | Yes |     |
| Orthodontics                      |     | Yes |     | Yes |     |
| Otolaryngology                    |     | Yes |     | Yes |     |
| Pain Management                   |     |     |     |     |     |
| Palliative Medicine               |     |     |     |     |     |
| Plastic Surgery                   |     | Yes |     |     |     |
| Psychiatry Of Learning Disability |     |     |     |     |     |
| Psychotherapy                     |     |     |     |     |     |
| Public Health Medicine            | Yes |     |     |     |     |
| Rehabilitation Medicine           |     | Yes |     |     |     |
| Renal Medicine                    |     | Yes |     |     |     |
| Respiratory Medicine              |     | Yes |     | Yes |     |
| Restorative Dentistry             |     |     |     |     |     |
| Rheumatology                      |     | Yes |     |     |     |
| Special Care Dentistry            |     | Yes |     | Yes |     |
| Surgical Dentistry                |     | Yes |     | Yes |     |
| Trauma And Orthopaedic Surgery    |     | Yes |     |     |     |
| Urology                           |     | Yes |     |     |     |
| Vascular Surgery                  |     | Yes |     |     |     |
| Virology                          |     |     |     |     |     |

There are two specialty fields in the SWISS database. These are “specialty” with around 85% completeness, and “second specialty” with lower completeness. We added data from TURAS

People (which holds data on doctors in training roles) to increase the completeness to approximately 98%.

*\* Specialities unable to be categorized into patient facing or non-patient facing roles were categorized into undetermined.*

*\*\*Patient facing medical specialties were categorized into front door, specialties exposed to aerosolized generating procedures and intensive care. Remaining specialties were categorized into 'other'*

*Definition of nursing and midwifery, allied health professionals and support services into patient facing and non-patient facing roles\**

| Job Family               | Job Sub Family                 | Non patient-facing | Patient facing** |            |                     |                |
|--------------------------|--------------------------------|--------------------|------------------|------------|---------------------|----------------|
|                          |                                |                    | Any              | Front-door | Resp-oral-nasal-AGP | Intensive care |
| ADMINISTRATIVE SERVICES  | FINANCE                        | Yes                |                  |            |                     |                |
| ADMINISTRATIVE SERVICES  | HUMAN RESOURCES                | Yes                |                  |            |                     |                |
| ADMINISTRATIVE SERVICES  | INFORMATION SYSTEMS/TECHNOLOGY | Yes                |                  |            |                     |                |
| ADMINISTRATIVE SERVICES  | NA                             | Yes                |                  |            |                     |                |
| ADMINISTRATIVE SERVICES  | NHS24 CALL HANDLER             | Yes                |                  |            |                     |                |
| ADMINISTRATIVE SERVICES  | OFFICE SERVICES                | Yes                |                  |            |                     |                |
| ADMINISTRATIVE SERVICES  | PATIENT SERVICES               | Yes                |                  |            |                     |                |
| ALLIED HEALTH PROFESSION | AHP TRAINING/ADMINISTRATION    | Yes                |                  |            |                     |                |
| ALLIED HEALTH PROFESSION | AMBULANCE PARAMEDIC            |                    | Yes              | Yes        |                     |                |
| ALLIED HEALTH PROFESSION | ARTS THERAPIES                 |                    |                  |            |                     |                |
| ALLIED HEALTH PROFESSION | DIAGNOSTIC RADIOGRAPHY         |                    | Yes              |            |                     |                |
| ALLIED HEALTH PROFESSION | DIETETICS                      |                    |                  |            |                     |                |
| ALLIED HEALTH PROFESSION | GENERIC THERAPIES              |                    |                  |            |                     |                |
| ALLIED HEALTH PROFESSION | OCCUPATIONAL THERAPY           |                    | Yes              |            |                     |                |
| ALLIED HEALTH PROFESSION | ORTHOPTICS                     |                    |                  |            |                     |                |
| ALLIED HEALTH PROFESSION | ORTHOTICS                      |                    | Yes              |            |                     |                |
| ALLIED HEALTH PROFESSION | PHYSIOTHERAPY                  |                    | Yes              |            | Yes                 |                |
| ALLIED HEALTH PROFESSION | PODIATRY                       |                    | Yes              |            |                     |                |
| ALLIED HEALTH PROFESSION | PROSTHETICS                    |                    |                  |            |                     |                |
| ALLIED HEALTH PROFESSION | SPEECH AND LANGUAGE THERAPY    |                    | Yes              |            |                     |                |
| ALLIED HEALTH PROFESSION | THERAPEUTIC RADIOGRAPHY        |                    | Yes              | Yes        |                     |                |

|                            |                                |     |     |     |     |  |
|----------------------------|--------------------------------|-----|-----|-----|-----|--|
| AMBULANCE SERVICES         | AMBULANCE CARE ASSISTANT       |     | Yes | Yes |     |  |
| AMBULANCE SERVICES         | AMBULANCE TECHNICIAN           |     | Yes | Yes |     |  |
| AMBULANCE SERVICES         | DRIVER                         |     | Yes | Yes |     |  |
| AMBULANCE SERVICES         | EMDC OPERATIVE                 | Yes |     |     |     |  |
| AMBULANCE SERVICES         | OPERATIONAL MANAGER            | Yes |     |     |     |  |
| AMBULANCE SERVICES         | PTS DAY CONTROL                | Yes |     |     |     |  |
| EMERGENCY SERVICES         | AMBULANCE AUXILIARY            |     | Yes | Yes |     |  |
| EMERGENCY SERVICES         | AMBULANCE CARE ASSISTANT       |     | Yes | Yes |     |  |
| EMERGENCY SERVICES         | AMBULANCE PARAMEDIC            |     | Yes | Yes |     |  |
| EMERGENCY SERVICES         | AMBULANCE TECHNICIAN           |     | Yes | Yes |     |  |
| EMERGENCY SERVICES         | DRIVER                         |     | Yes | Yes |     |  |
| EMERGENCY SERVICES         | EMDC OPERATIVE                 | Yes |     |     |     |  |
| EMERGENCY SERVICES         | OPERATIONAL MANAGER            | Yes |     |     |     |  |
| EMERGENCY SERVICES         | PTS DAY CONTROL                |     |     |     |     |  |
| HEALTHCARE SCIENCES        | BIOMEDICAL SCIENCES LIFE       |     |     |     |     |  |
| HEALTHCARE SCIENCES        | CLIN PHOTO/ILLUSTRATE PHYSICAL |     |     |     |     |  |
| HEALTHCARE SCIENCES        | CLINICAL PERFUSION PHYSIOLOGY  |     |     |     |     |  |
| HEALTHCARE SCIENCES        | CLINICAL PHYSIOLOGY            |     |     |     |     |  |
| HEALTHCARE SCIENCES        | CLINICAL SCIENCES LIFE         |     |     |     |     |  |
| HEALTHCARE SCIENCES        | CLINICAL SCIENCES PHYSICAL     |     |     |     |     |  |
| HEALTHCARE SCIENCES        | CLINICAL SCIENCES PHYSIOLOGY   |     |     |     |     |  |
| HEALTHCARE SCIENCES        | CLINICAL TECHNOLOGY LIFE       |     |     |     |     |  |
| HEALTHCARE SCIENCES        | CLINICAL TECHNOLOGY PHYSICAL   |     |     |     |     |  |
| HEALTHCARE SCIENCES        | MAXILLOFACIAL PROS PHYSICAL    |     |     |     |     |  |
| HEALTHCARE SCIENCES        | NA                             |     |     |     |     |  |
| HEALTHCARE SCIENCES        | STERILE SERVICES LIFE          |     |     |     |     |  |
| MEDICAL AND DENTAL SUPPORT | DENTAL NURSING                 |     | Yes |     | Yes |  |

|                            |                                |     |     |     |     |  |
|----------------------------|--------------------------------|-----|-----|-----|-----|--|
| MEDICAL AND DENTAL SUPPORT | DENTAL TECHNOLOGY              |     | Yes |     | Yes |  |
| MEDICAL AND DENTAL SUPPORT | OPERATING DEPARTMENT           |     | Yes |     |     |  |
| MEDICAL AND DENTAL SUPPORT | ORAL HEALTH                    |     | Yes |     | Yes |  |
| MEDICAL AND DENTAL SUPPORT | PHYSICIANS ASSISTANT           |     |     |     |     |  |
| MEDICAL AND DENTAL SUPPORT | THEATRE SERVICES               |     | Yes |     |     |  |
| MEDICAL SUPPORT            | OPERATING DEPARTMENT           |     | Yes |     |     |  |
| MEDICAL SUPPORT            | PHYSICIANS ASSISTANT           |     | Yes |     |     |  |
| MEDICAL SUPPORT            | THEATRE SERVICES               |     | Yes |     |     |  |
| NURSING AND MIDWIFERY      | COMMUNITY CHILDREN'S NURSING   |     |     |     |     |  |
| NURSING AND MIDWIFERY      | MIDWIFERY DIRECT CC            |     | Yes |     |     |  |
| NURSING AND MIDWIFERY      | MIDWIFERY INDIRECT CC          |     | Yes |     |     |  |
| NURSING AND MIDWIFERY      | NA                             |     |     |     |     |  |
| NURSING AND MIDWIFERY      | NEONATAL MIDWIFERY CC          |     | Yes |     |     |  |
| NURSING AND MIDWIFERY      | NEONATAL MIDWIFERY DIRECT CC   |     | Yes |     |     |  |
| NURSING AND MIDWIFERY      | NEONATAL MIDWIFERY INDIRECT CC |     | Yes |     |     |  |
| NURSING AND MIDWIFERY      | NEONATAL NURSING DIRECT CC     |     | Yes |     |     |  |
| NURSING AND MIDWIFERY      | NEONATAL NURSING INDIRECT CC   |     | Yes |     |     |  |
| NURSING AND MIDWIFERY      | NHS 24 NURSING                 | Yes |     |     |     |  |
| NURSING AND MIDWIFERY      | NURSING TRAINING/ADMIN/MGT     |     |     |     |     |  |
| NURSING AND MIDWIFERY      | PAEDIATRIC NURSING             |     | Yes | Yes |     |  |
| NURSING AND MIDWIFERY      | PRACTICE NURSING               |     | Yes |     |     |  |
| NURSING AND MIDWIFERY      | PUBLIC HEALTH NURSING          |     |     |     |     |  |
| NURSING AND MIDWIFERY      | SCHOOL NURSING                 |     |     |     |     |  |
| NURSING AND MIDWIFERY      | SEXUAL AND REPRODUCTIVE HEALTH |     |     |     |     |  |
| NURSING AND MIDWIFERY      | SPECIALIST NURSING             |     | Yes |     |     |  |
| NURSING AND MIDWIFERY      | STAFF NURSERY                  |     |     |     |     |  |
| NURSING AND MIDWIFERY      | TREATMENT ROOM NURSING         |     | Yes |     |     |  |

|                          |                               |     |     |     |  |  |
|--------------------------|-------------------------------|-----|-----|-----|--|--|
| NURSING AND MIDWIFERY    | BANK NURSING                  |     | Yes |     |  |  |
| NURSING AND MIDWIFERY    | BTS NURSING                   |     | Yes | Yes |  |  |
| NURSING AND MIDWIFERY    | CARE OF THE ELDERLY NURSING   |     | Yes | Yes |  |  |
| NURSING AND MIDWIFERY    | COMMUNITY GENERAL NURSING     |     | Yes |     |  |  |
| NURSING AND MIDWIFERY    | DISTRICT NURSING              |     | Yes |     |  |  |
| NURSING AND MIDWIFERY    | FAMILY PLANNING NURSING       |     |     |     |  |  |
| NURSING AND MIDWIFERY    | GENERAL ACUTE NURSING         |     | Yes | Yes |  |  |
| NURSING AND MIDWIFERY    | HEALTH VISITOR NURSING        |     |     |     |  |  |
| NURSING AND MIDWIFERY    | LEARNING DISABILITIES NURSING |     | Yes |     |  |  |
| NURSING AND MIDWIFERY    | MENTAL HEALTH NURSING         |     | Yes |     |  |  |
| NURSING AND MIDWIFERY    | MIDWIFERY                     |     | Yes |     |  |  |
| OTHER THERAPEUTIC        | GENETIC COUNSELLING           |     |     |     |  |  |
| OTHER THERAPEUTIC        | NA                            |     |     |     |  |  |
| OTHER THERAPEUTIC        | OPTOMETRY                     |     |     |     |  |  |
| OTHER THERAPEUTIC        | PHARMACY                      |     |     |     |  |  |
| OTHER THERAPEUTIC        | PHARMACY TECHNICIANS          | Yes |     |     |  |  |
| OTHER THERAPEUTIC        | PLAY SPECIALIST               |     | Yes |     |  |  |
| OTHER THERAPEUTIC        | PSYCHOLOGY                    |     |     |     |  |  |
| PERSONAL AND SOCIAL CARE | CARE AT HOME                  |     | Yes |     |  |  |
| PERSONAL AND SOCIAL CARE | HEALTH PROMOTION              |     |     |     |  |  |
| PERSONAL AND SOCIAL CARE | HOSPITAL CHAPLAINCY           |     |     |     |  |  |
| PERSONAL AND SOCIAL CARE | RESIDENTIAL / DAY CARE        |     | Yes |     |  |  |
| PERSONAL AND SOCIAL CARE | SOCIAL WORK                   |     |     |     |  |  |
| SENIOR MANAGERS          | NA                            | Yes |     |     |  |  |
| SUPPORT SERVICES         | CATERING SERVICES             |     |     |     |  |  |
| SUPPORT SERVICES         | DOMESTIC SERVICES             |     |     |     |  |  |
| SUPPORT SERVICES         | ESTATES                       |     |     |     |  |  |

|                         |                        |  |     |  |  |  |
|-------------------------|------------------------|--|-----|--|--|--|
| SUPPORT SERVICES        | GENERAL SERVICES       |  |     |  |  |  |
| SUPPORT SERVICES        | GROUNDS SERVICES       |  |     |  |  |  |
| SUPPORT SERVICES        | HOTEL SERVICES         |  |     |  |  |  |
| SUPPORT SERVICES        | LAUNDRY/LINEN SERVICES |  |     |  |  |  |
| SUPPORT SERVICES        | NA                     |  |     |  |  |  |
| SUPPORT SERVICES        | PORTERING SERVICES     |  | Yes |  |  |  |
| SUPPORT SERVICES        | SECURITY SERVICES      |  |     |  |  |  |
| SUPPORT SERVICES        | STERILE SERVICES       |  |     |  |  |  |
| SUPPORT SERVICES        | STORES SERVICES        |  |     |  |  |  |
| SUPPORT SERVICES        | TRANSPORT SERVICES     |  |     |  |  |  |
| UNALLOCATED / NOT KNOWN | NA                     |  |     |  |  |  |
| UNALLOCATED / NOT KNOWN | NOT KNOWN              |  |     |  |  |  |

*\* Roles unable to be categorized into patient facing or non-patient facing were categorized into undetermined.*

*\*\*Patient facing roles were categorized into front door, specialties exposed to aerosolized generating procedures and intensive care. Remaining specialties were categorized into 'other'*

*Definition of relevant service areas*

|                          | Front –door | Respiratory-oro-aerosol – generating procedures | Intensive care |
|--------------------------|-------------|-------------------------------------------------|----------------|
| Accident and Emergency   | Yes         |                                                 |                |
| Anaesthetics             |             |                                                 | Yes            |
| Ear Nose & Throat        |             | Yes                                             |                |
| Endocrinology & Diabetes |             |                                                 |                |
| Gastroenterology         |             |                                                 |                |
| General Medicine         | Yes         |                                                 |                |
| Infectious Diseases      | Yes         |                                                 |                |
| Intensive Care           |             |                                                 | Yes            |
| Neonatal/SCBU            |             |                                                 | Yes            |
| Oral & Maxillofacial     |             | Yes                                             |                |
| Respiratory              |             | Yes                                             |                |
| Restorative Dentistry    |             | Yes                                             |                |

|                    |  |     |  |
|--------------------|--|-----|--|
| Rheumatology       |  |     |  |
| Surgical Dentistry |  | Yes |  |



#### Appendix 4: Changes in infection prevention and control guidance in Scotland

The following text was taken from guidance documents produced by Health Protection Scotland and (when this joined with other NHS bodies to form Public Health Scotland) Public Health Scotland.

| Version | Date      | Staff                                                                                                                                                                                                                                                                                                                                                                                                                                                                                                                                                                           | Clinicians                                                                                                                                                                                                                                                                                                                                                                                                                                                                                                                                                                         | Visitors                                                                                                                                                                                                                                                                                                                                                                                                                                                                                                           |
|---------|-----------|---------------------------------------------------------------------------------------------------------------------------------------------------------------------------------------------------------------------------------------------------------------------------------------------------------------------------------------------------------------------------------------------------------------------------------------------------------------------------------------------------------------------------------------------------------------------------------|------------------------------------------------------------------------------------------------------------------------------------------------------------------------------------------------------------------------------------------------------------------------------------------------------------------------------------------------------------------------------------------------------------------------------------------------------------------------------------------------------------------------------------------------------------------------------------|--------------------------------------------------------------------------------------------------------------------------------------------------------------------------------------------------------------------------------------------------------------------------------------------------------------------------------------------------------------------------------------------------------------------------------------------------------------------------------------------------------------------|
|         | 23-Jan-20 | <p>Ensure that staff are:</p> <ul style="list-style-type: none"> <li>- Familiar with all Personal Protective Equipment (PPE) required including, provision of adequate supplies, safe donning and removal procedures, where stored and how it should be used;</li> <li>· Aware of what actions to take if a case presents;</li> <li>· Aware of where a case will be isolated and the need for a negative pressure room, if available;</li> <li>· Familiar with FFP3 respirator use and that fit testing and checking has been undertaken before using this equipment</li> </ul> | <p>Clinicians must:</p> <ul style="list-style-type: none"> <li>- Admit patients requiring admission directly to a negative pressure isolation room. If this is not possible then a single room with en-suite facilities should be used. The room door must be kept closed.</li> <li>- Wear appropriate PPE: as a minimum, this should be a FFP3 respirator, disposable, long-sleeved, fluid resistant surgical gown, disposable gloves and eye/face protection.</li> <li>- Ask the patient (if tolerable) to wear a FRSM while being transported to the isolation room.</li> </ul> |                                                                                                                                                                                                                                                                                                                                                                                                                                                                                                                    |
| 5.0     | 07-Feb-20 | Same as above                                                                                                                                                                                                                                                                                                                                                                                                                                                                                                                                                                   | Same as above                                                                                                                                                                                                                                                                                                                                                                                                                                                                                                                                                                      |                                                                                                                                                                                                                                                                                                                                                                                                                                                                                                                    |
| 6.2     | 02-Mar-20 | Same as above                                                                                                                                                                                                                                                                                                                                                                                                                                                                                                                                                                   | Same as above                                                                                                                                                                                                                                                                                                                                                                                                                                                                                                                                                                      |                                                                                                                                                                                                                                                                                                                                                                                                                                                                                                                    |
| 6.6     | 12-Mar-20 | Same as above                                                                                                                                                                                                                                                                                                                                                                                                                                                                                                                                                                   | <p>Clinicians must:</p> <p>Same as above <b>plus</b></p> <ul style="list-style-type: none"> <li>- Wear appropriate PPE</li> </ul>                                                                                                                                                                                                                                                                                                                                                                                                                                                  | <p>If the person is admitted visitors should be restricted to essential visitors only; such as parents of paediatric patients or an affected patient's partner/main carer. Local risk assessment and practical management should be considered, ensuring a pragmatic and proportionate response, including the consideration of whether there is a requirement for visitors to wear PPE including RPE. These visitors must not visit any other care areas or facilities. A log of all visitors should be kept.</p> |
| 7.0     | 13-Mar-20 | Same as above                                                                                                                                                                                                                                                                                                                                                                                                                                                                                                                                                                   | Same as above                                                                                                                                                                                                                                                                                                                                                                                                                                                                                                                                                                      |                                                                                                                                                                                                                                                                                                                                                                                                                                                                                                                    |
| 7.1     | 14-Mar-20 | Same as above                                                                                                                                                                                                                                                                                                                                                                                                                                                                                                                                                                   | <p>Clinicians must:</p> <p>Same as above <b>plus</b></p> <ul style="list-style-type: none"> <li>- Assess individuals in a single occupancy room.</li> </ul>                                                                                                                                                                                                                                                                                                                                                                                                                        |                                                                                                                                                                                                                                                                                                                                                                                                                                                                                                                    |
| 8.0     | 16-Mar-20 | Same as above                                                                                                                                                                                                                                                                                                                                                                                                                                                                                                                                                                   | Same as above                                                                                                                                                                                                                                                                                                                                                                                                                                                                                                                                                                      |                                                                                                                                                                                                                                                                                                                                                                                                                                                                                                                    |
| 8.1     | 19-Mar-20 | <p>Same as above <b>plus:</b></p> <p>Staff who are pregnant or otherwise immunosuppressed should not provide direct care for a patient with possible or confirmed COVID-19, this includes obtaining samples. Any deviation from this should be a local decision. Pregnant staff or staff who are immunosuppressed should seek advice from the local Occupational Health Department.</p>                                                                                                                                                                                         | Same as above                                                                                                                                                                                                                                                                                                                                                                                                                                                                                                                                                                      |                                                                                                                                                                                                                                                                                                                                                                                                                                                                                                                    |
| 8.2     | 27-Mar-20 | <p>Same as above plus</p> <p>Staff with underlying health conditions that put them at increased risk of severe illness from COVID-19, including those who are immunosuppressed, should not provide direct care to patients with possible or confirmed COVID-19. Staff who think they may be at</p>                                                                                                                                                                                                                                                                              | Same as above                                                                                                                                                                                                                                                                                                                                                                                                                                                                                                                                                                      |                                                                                                                                                                                                                                                                                                                                                                                                                                                                                                                    |

|     |           |                                                                                                                                                                                                                                                                                                                                                                                                                                                                                                                                                                                                                                                                                                                                                                                                 |                                                                                                                                                                                                                                                                                                                                                                                                                                                                                                                                                                     |  |
|-----|-----------|-------------------------------------------------------------------------------------------------------------------------------------------------------------------------------------------------------------------------------------------------------------------------------------------------------------------------------------------------------------------------------------------------------------------------------------------------------------------------------------------------------------------------------------------------------------------------------------------------------------------------------------------------------------------------------------------------------------------------------------------------------------------------------------------------|---------------------------------------------------------------------------------------------------------------------------------------------------------------------------------------------------------------------------------------------------------------------------------------------------------------------------------------------------------------------------------------------------------------------------------------------------------------------------------------------------------------------------------------------------------------------|--|
|     |           | increased risk should seek advice from their line manager or local Occupational Health service.                                                                                                                                                                                                                                                                                                                                                                                                                                                                                                                                                                                                                                                                                                 |                                                                                                                                                                                                                                                                                                                                                                                                                                                                                                                                                                     |  |
| 8.3 | 30-Mar-20 |                                                                                                                                                                                                                                                                                                                                                                                                                                                                                                                                                                                                                                                                                                                                                                                                 | Same as above plus Update on AGP procedures                                                                                                                                                                                                                                                                                                                                                                                                                                                                                                                         |  |
| 9.0 | 02-Apr-20 | <p>Same as above <b>plus</b></p> <p>- <a href="#">COVID-19 Guidance for Infection Prevention and Control in Healthcare Settings [Item 1]</a> describes the Infection Prevention and Control measures required for management of possible/confirmed COVID-19 patients.</p> <p>- Table 1 of the guidance [<b>Item 2</b>] details the recommended PPE for Healthcare workers within the secondary care inpatient clinical setting within the NHS and independent sectors.</p> <p>Table 4 of the guidance [<b>Item 3</b>] provides additional considerations, in addition to standard infection prevention and control precautions, where there is sustained transmission of COVID-19, taking into account individual risk assessment for this new and emerging pathogen, NHS and independent .</p> | <p>Same as above <b>plus</b></p> <p><b>Actions to take if possible case definition is met for COVID-19</b></p> <p>Ensure the patient is placed in a negative pressure room, a single side room with en-suite facilities or within a specified cohort bay and the PPE described in <a href="#">COVID-19 Guidance for infection prevention and control in healthcare settings [Item 1]</a>, is worn by any person entering the room.</p> <p>Ensure that the patient, potentially contaminated areas, and waste are managed as per the infection control guidance.</p> |  |
| 9.1 | 11-Apr-20 | <p>Same as above <b>plus</b></p> <p>HCWs who come into contact with a COVID-19 patient or a patient suspected of having COVID-19 while not wearing personal protective equipment (PPE) should follow the advice on the guidance on Management of Exposed Healthcare Workers and Patients in Hospital setting [<b>Item 4</b>]</p>                                                                                                                                                                                                                                                                                                                                                                                                                                                                | Same as above                                                                                                                                                                                                                                                                                                                                                                                                                                                                                                                                                       |  |
| 9.2 | 29-Apr-20 | Same as above                                                                                                                                                                                                                                                                                                                                                                                                                                                                                                                                                                                                                                                                                                                                                                                   | <p>Same as above <b>plus</b></p> <p>Staff should be aware of ongoing transmission within the hospital setting. An outbreak is defined as two or more confirmed or suspected cases of COVID-19 where nosocomial infection and ongoing transmission is suspected to have occurred within a 14-day period.</p>                                                                                                                                                                                                                                                         |  |

Health Protection Scotland

NHS Education for Scotland

## UK Coronavirus COVID-19 response

### Infection prevention and control measures



The information contained in this resource was based on available guidance at the time of publication 28<sup>th</sup> March 2020 (afternoon).  
Published March 28<sup>th</sup> 2020 Version 1

Health Protection Scotland

NHS Education for Scotland

## UK Coronavirus COVID-19 response

The information contained in this resource is based on available guidance at the time of publication- 28<sup>th</sup> March 2020 (afternoon).

**Important Note:**  
The COVID-19 response is evolving rapidly and guidance will change as more information becomes available.

The most current version of Health Protection Scotland COVID-19 guidance and this resource will be available on the HPS COVID-19 website and should be referred to.

Guidance:  
<https://www.hps.scot.nhs.uk/a-to-z-of-topics/covid-19/>

Resource:  
<https://www.hps.scot.nhs.uk/web-resources-container/covid-19-guidance-for-infection-prevention-and-control-in-healthcare-settings/>

### COVID-19 response

### Item 1

The version of the document referred to in the guidance is no longer available at that link (<https://www.hps.scot.nhs.uk/web-resources-container/covid-19-guidance-for-infection-prevention-and-control-in-healthcare-settings/>), but can be obtained on The Internet Archive (<https://web.archive.org/>) by searching for the url. The first two pages have been reproduced here.

## Recommended PPE for healthcare workers by secondary care inpatient clinical setting, NHS and independent sector

| Setting                                                                                                                      | Context                                                                                                                                                                      | Disposable Gloves         | Disposable Plastic Apron  | Disposable fluid-resistant gown       | Surgical mask | Fluid-resistant (Type IIR) surgical mask | Filtering face piece respirator | Eye/face protection <sup>1</sup>                       |
|------------------------------------------------------------------------------------------------------------------------------|------------------------------------------------------------------------------------------------------------------------------------------------------------------------------|---------------------------|---------------------------|---------------------------------------|---------------|------------------------------------------|---------------------------------|--------------------------------------------------------|
| Acute hospital inpatient and emergency departments, mental health learning disability, autism, dental and maternity settings | Performing a single aerosol generating procedure <sup>2</sup> on a possible or confirmed case <sup>3</sup> in any setting outside a higher risk acute care area <sup>4</sup> | ✓ single use <sup>5</sup> | ✗                         | ✓ single use <sup>5</sup>             | ✗             | ✗                                        | ✓ single use <sup>5</sup>       | ✓ single use <sup>5</sup>                              |
|                                                                                                                              | Working in a higher risk acute care area <sup>4</sup> with possible or confirmed case(s) <sup>3</sup>                                                                        | ✓ single use <sup>5</sup> | ✓ single use <sup>5</sup> | ✓ sessional use <sup>6</sup>          | ✗             | ✗                                        | ✓ sessional use <sup>6</sup>    | ✓ sessional use <sup>6</sup>                           |
|                                                                                                                              | Working in an inpatient, maternity, radiology area with possible or confirmed case(s) <sup>3</sup> – direct patient care (within 2 metres)                                   | ✓ single use <sup>5</sup> | ✓ single use <sup>5</sup> | ✗                                     | ✗             | ✓ sessional use <sup>6</sup>             | ✗                               | ✓ sessional use <sup>6</sup>                           |
|                                                                                                                              | Working in an inpatient area with possible or confirmed case(s) <sup>3</sup> (not within 2 metres)                                                                           | ✗                         | ✗                         | ✗                                     | ✗             | ✓ sessional use <sup>6</sup>             | ✗                               | ✓ risk assess sessional use <sup>6,7</sup>             |
|                                                                                                                              | Working in an emergency department/acute assessment area with possible or confirmed case(s) <sup>3</sup> – direct patient care (within 2 metres)                             | ✓ single use <sup>5</sup> | ✓ single use <sup>5</sup> | ✗                                     | ✗             | ✓ sessional use <sup>6</sup>             | ✗                               | ✓ sessional use <sup>6</sup>                           |
|                                                                                                                              | All individuals transferring possible or confirmed case(s) <sup>3</sup> (within 2 metres)                                                                                    | ✓ single use <sup>5</sup> | ✓ single use <sup>5</sup> | ✗                                     | ✗             | ✓ single or sessional use <sup>6,8</sup> | ✗                               | ✓ risk assess single or sessional use <sup>6,8,7</sup> |
|                                                                                                                              | Operating theatre with possible or confirmed case(s) <sup>3</sup> – no AGPs <sup>2</sup>                                                                                     | ✓ single use <sup>5</sup> | ✓ single use <sup>5</sup> | ✓ risk assess single use <sup>7</sup> | ✗             | ✓ single or sessional use <sup>6</sup>   | ✗                               | ✓ single or sessional use <sup>6</sup>                 |
|                                                                                                                              | Labour ward/area – 2nd/3rd stage labour vaginal delivery (no AGPs <sup>2</sup> ) – possible or confirmed case <sup>3</sup>                                                   | ✓ single use <sup>5</sup> | ✓ single use <sup>5</sup> | ✓ single use <sup>5</sup>             | ✗             | ✓ single or sessional use <sup>6,8</sup> | ✗                               | ✓ single or sessional use <sup>6</sup>                 |
| Inpatient care to any individuals in the extremely vulnerable group undergoing shielding <sup>8</sup>                        | ✓ single use <sup>5</sup>                                                                                                                                                    | ✓ single use <sup>5</sup> | ✗                         | ✓ single use <sup>5</sup>             | ✗             | ✗                                        | ✗                               |                                                        |

Table 1

- This may be single or reusable face/eye protection/full face visor or goggles.
  - The full list of aerosol generating procedures (AGPs) is within the COVID-19 IPC guidance [note AGPs are undergoing a further review at present].
  - A case is any individual meeting case definition for a possible or confirmed case. <https://www.gov.uk/government/publications/wuhan-novel-coronavirus-initial-investigation-of-possible-cases/investigation-and-initial-clinical-management-of-possible-cases-of-wuhan-novel-coronavirus-wn-cov-infection>
  - Higher risk acute areas include: ICU+HDUs; ED resuscitation areas; wards with non-invasive ventilation; operating theatres; endoscopy units for upper Respiratory, ENT or upper GI endoscopy; and other clinical areas where AGPs are regularly performed.
  - Single use refers to disposal of PPE or decontamination of reusable items e.g. eye protection or respirator, after each patient and/or following completion of a procedure, task, or session; dispose or decontaminate reusable items after each patient contact as per Standard Infection Control Precautions (SICPs).
  - A session refers to a period of time where a healthcare worker is undertaking duties in a specific care setting/exposure environment e.g. on a ward round; providing ongoing care for inpatients. A session ends when the healthcare worker leaves the care setting/exposure environment. Sessional use should always be risk assessed and considered where there are high rates of hospital cases. PPE should be disposed of after each session or earlier if damaged, soiled, or uncomfortable.
  - Risk-assessed use refers to utilizing PPE when there is an anticipated/likely risk of contamination with splashes, droplets of blood or body fluids.
  - For explanation of shielding and definition of extremely vulnerable groups see guidance. <https://www.gov.uk/government/publications/guidance-on-shielding-and-protecting-extremely-vulnerable-persons-from-covid-19/guidance-on-shielding-and-protecting-extremely-vulnerable-persons-from-covid-19>
- Patient use of PPE:** In cohort wards, communal waiting areas and during transportation, it is recommended that suspected or confirmed cases wear a surgical face mask if this can be tolerated. The aim of this is to minimise the dispersal of respiratory secretions, reduce both direct transmission risk and environmental contamination. A surgical face mask should not be worn by patients if there is potential for their clinical care to be compromised (e.g. when receiving oxygen therapy).

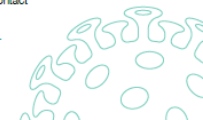

**Item 2** - The version of the document referred to in the guidance is no longer available at that link ([https://assets.publishing.service.gov.uk/government/uploads/system/uploads/attachment\\_data/file/877728/T1\\_Recommended\\_PPE\\_for\\_healthcare\\_workers\\_by\\_secondary\\_care\\_clinical\\_context\\_poster.pdf](https://assets.publishing.service.gov.uk/government/uploads/system/uploads/attachment_data/file/877728/T1_Recommended_PPE_for_healthcare_workers_by_secondary_care_clinical_context_poster.pdf)), but can be obtained on The Internet Archive (<https://web.archive.org/>) and has been reproduced as an image here.

## Additional considerations, in addition to standard infection prevention and control precautions,

where there is sustained transmission of COVID-19, taking into account individual risk assessment for this new and emerging pathogen, NHS and independent sector

| Setting     | Context                                                                                                                                  | Disposable Gloves            | Disposable Plastic Apron     | Disposable fluid-repellent coverall/gown | Surgical mask | Fluid-resistant (Type IIR) surgical mask        | Filtering face piece respirator | Eye/face protection <sup>1</sup>                |
|-------------|------------------------------------------------------------------------------------------------------------------------------------------|------------------------------|------------------------------|------------------------------------------|---------------|-------------------------------------------------|---------------------------------|-------------------------------------------------|
| Any setting | Direct patient/resident care assessing an individual that is not currently a possible or confirmed case <sup>2</sup> (within 2 metres)   | ✓<br>single use <sup>3</sup> | ✓<br>single use <sup>3</sup> | ✗                                        | ✗             | ✓<br>risk assess<br>seasonal use <sup>4,5</sup> | ✗                               | ✓<br>risk assess<br>seasonal use <sup>4,5</sup> |
| Any setting | Performing an aerosol generating procedure <sup>6</sup> on an individual that is not currently a possible or confirmed case <sup>2</sup> | ✓<br>single use <sup>3</sup> | ✗                            | ✓<br>single use <sup>3</sup>             | ✗             | ✗                                               | ✓<br>single use <sup>3</sup>    | ✓<br>single use <sup>3</sup>                    |

Table 4

- This may be single or reusable face/eye protection/full face visor or goggles.
- A case is any individual meeting case definition for a possible or confirmed case: <https://www.gov.uk/government/publications/wuhan-novel-coronavirus-initial-investigation-of-possible-cases/investigation-and-initial-clinical-management-of-possible-cases-of-wuhan-novel-coronavirus-wi-cov-infection>
- Single use refers to disposal of PPE or decontamination of reusable items e.g. eye protection or respirator, after each patient and/or following completion of a procedure, task, or session; dispose or decontaminate reusable items after each patient contact as per Standard Infection Control Precautions (SICPs).
- Risk assess refers to utilizing PPE when there is an anticipated/likely risk of contamination with splashes, droplets of blood or body fluids. **Where staff consider there is a risk to themselves or the individuals they are caring for they should wear a fluid repellent surgical mask with or without eye protection as determined by the individual staff member for the care episode/single session.**
- A single session refers to a period of time where a health care worker is undertaking duties in a specific care setting/exposure environment e.g. on a ward round, providing ongoing care for inpatients. A session ends when the health care worker leaves the care setting/exposure environment. Seasonal use should always be risk assessed and consider the risk of infection to and from patients, residents and health and care workers where COVID-19 is circulating in the community and hospitals. PPE should be disposed of after each session or earlier if damaged, soiled, or uncomfortable.
- The full list of aerosol generating procedures (AGPs) is within the IPC guidance [note AGPs are undergoing a further review at present].

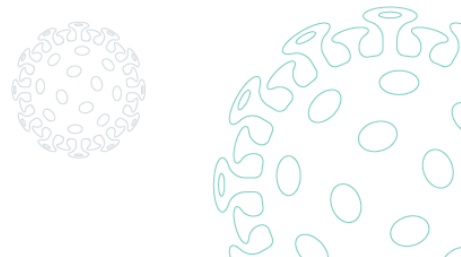

**Item 3** - The version of the document referred to in the guidance is no longer available at that link ([https://assets.publishing.service.gov.uk/government/uploads/system/uploads/attachment\\_data/file/877603/T4\\_Additional\\_considerations\\_of\\_COVID-19\\_poster.pdf](https://assets.publishing.service.gov.uk/government/uploads/system/uploads/attachment_data/file/877603/T4_Additional_considerations_of_COVID-19_poster.pdf)), but the document can be obtained on The Internet Archive (<https://web.archive.org/>) and has been reproduced as an image here.

#### Item 4

(<https://www.gov.uk/government/publications/covid-19-management-of-exposed-healthcare-workers-and-patients-in-hospital-settings/covid-19-management-of-exposed-healthcare-workers-and-patients-in-hospital-settings>) which was the original link is not now accessible. The text is reproduced below and the document can be obtained from the Internet Archive (<https://web.archive.org/>).

“Healthcare workers (HCWs) are vital for the functioning of the health system to ensure that we can treat patients appropriately. In addition, managers have a high level of skill in assessing whether individual staff are developing symptoms that would require exclusion from work. HCWs themselves are educated about prevention of the nosocomial spread of disease. It is a well-established practice for individuals not to come to work with respiratory tract infections.

##### 1. Staff exposures

HCWs who come into contact with a COVID-19 patient or a patient suspected of having COVID-19 while not wearing personal protective equipment (PPE) can remain at work. This is because in most instances this will be a short-lived exposure, unlike exposure in a household setting that is ongoing.

HCWs should:

not attend work if they develop symptoms while at home (off-duty), and notify their line manager immediately

self-isolate and immediately inform their line manager if symptoms develop while at work

If the HCW’s symptoms do not get better after 7 days, or their condition gets worse, they should speak to their occupational health department or use the NHS 111 online coronavirus service. If they do not have internet access, call NHS 111. For a medical emergency dial 999.

The current recommended PPE that must be worn when caring for COVID-19 patients is described in the infection prevention and control guidance.

These are guiding principles and there may need to be an individual risk assessment based on staff circumstances, for example for those who are immunocompromised.

##### 2. Staff return to work criteria

Symptomatic staff can return to work:

on day 8 after the onset of symptoms if clinical improvement has occurred and they have been afebrile (not feverish) for 2 days

if a cough is the only persistent symptom on day 8, they can return to work (post-viral cough is known to persist for several weeks in some cases)

##### 3. Patient exposures

In-patients who are known to have been exposed to a confirmed COVID-19 patient should be isolated or cohorted until their hospital admission ends, or until 14 days after last exposure.

If symptoms or signs consistent with COVID-19 occur in the 14 days after exposure then relevant diagnostic tests, including the COVID-19 test, should be performed.

On discharge, patients should be given written advice to stay at home and referred to the stay at home guidance if less than 14 days has elapsed since their exposure.”

### *Appendix 5: Comorbidity definitions*

The following ICD-10 definitions were used to define each comorbidity (British National Formulary definitions are included in our public github repository).

#### CIRCULATORY DISORDERS

|                                           |                                                                                                                                                                                                                                                                                                                                                                                                                      |
|-------------------------------------------|----------------------------------------------------------------------------------------------------------------------------------------------------------------------------------------------------------------------------------------------------------------------------------------------------------------------------------------------------------------------------------------------------------------------|
| Ischaemic heart disease                   | I20-I25                                                                                                                                                                                                                                                                                                                                                                                                              |
| Other heart disease                       | I00-102<br>I05-I09<br>I10-I15<br>I26-I28<br>I30-I52                                                                                                                                                                                                                                                                                                                                                                  |
| Cerebrovascular Disease                   | I60-I69<br>G45 = Transient cerebral ischaemic attacks<br>G46 = Vascular syndromes of brain in cerebrovascular diseases                                                                                                                                                                                                                                                                                               |
| Other circulatory system diseases         | I70-I79 Diseases of arteries, arterioles and capillaries<br><br>I80-I89 Diseases of veins, lymphatic vessels and lymph nodes, not elsewhere classified<br>I95-I99 Other and unspecified disorders of the circulatory system<br>Z958 presence of vascular implants and grafts<br>Z959 presence of vascular implants and grafts NOS                                                                                    |
| Neurological diseases except inflammatory |                                                                                                                                                                                                                                                                                                                                                                                                                      |
| Epilepsy                                  | G40-G47 Episodic and paroxysmal disorders                                                                                                                                                                                                                                                                                                                                                                            |
| Mono and polyneuropathies                 | G50-G59 Nerve, nerve root and plexus disorders<br><br>G60-G64 Polyneuropathies and other disorders of the peripheral nervous system                                                                                                                                                                                                                                                                                  |
| Other neurological conditions             | G10-G14 Systemic atrophies primarily affecting the central nervous system<br>G20-G26 Extrapyrmidal and movement disorders<br>G30-G32 Other degenerative diseases of the nervous system<br>G35-G37 Demyelinating diseases of the central nervous system<br>G70-G73 Diseases of myoneural junction and muscle<br>G80-G83 Cerebral palsy and other paralytic syndromes<br>G90-G99 Other disorders of the nervous system |
| Respiratory diseases                      |                                                                                                                                                                                                                                                                                                                                                                                                                      |
| Acute respiratory infections              | J00-J06 Acute upper respiratory infections<br><br>J09-J18 Influenza and pneumonia<br>J20-J22 Other acute lower respiratory infections                                                                                                                                                                                                                                                                                |
| Asthma                                    | J45 Asthma                                                                                                                                                                                                                                                                                                                                                                                                           |



|                                                          |                                                                                                                                                                                                                                                                                                                                                                                                                                                                                                                                                         |
|----------------------------------------------------------|---------------------------------------------------------------------------------------------------------------------------------------------------------------------------------------------------------------------------------------------------------------------------------------------------------------------------------------------------------------------------------------------------------------------------------------------------------------------------------------------------------------------------------------------------------|
|                                                          | J46 Status asthmaticus                                                                                                                                                                                                                                                                                                                                                                                                                                                                                                                                  |
| Other Chronic lower respiratory disease                  | J40 Bronchitis, not specified as acute or chronic<br>J41 Simple and mucopurulent chronic bronchitis<br>J42 Unspecified chronic bronchitis<br>J43 Emphysema<br>J44 Other chronic obstructive pulmonary disease<br>J47 Bronchiectasis<br>J60-J70 Lung diseases due to external agents<br>J80-J84 Other respiratory diseases principally affecting the interstitium<br>J85-J86 Suppurative and necrotic conditions of lower respiratory tract<br>J90-J94 Other diseases of pleura<br>J95-J99 Other diseases of the respiratory system<br>G473 Sleep apnoea |
| Tuberculosis                                             | A15 Respiratory tuberculosis, bacteriologically and histologically confirmed<br>A16 Respiratory tuberculosis, not confirmed bacteriologically or histologically<br>A17 Tuberculosis of nervous system<br>A18 Tuberculosis of other organs<br>A19 Miliary tuberculosis                                                                                                                                                                                                                                                                                   |
| Connective tissue diseases<br>Connective tissue disorder | M050 Felty syndrome<br><br>M051 Rheumatoid lung disease<br>M052 Rheumatoid vasculitis<br>M053 Rheumatoid arthritis with involvement of other organs and systems<br>M058 Other seropositive rheumatoid arthritis<br>M059 Seropositive rheumatoid arthritis, unspecified<br>M060 Seronegative rheumatoid arthritis<br>M063 Rheumatoid nodule<br>M069 Rheumatoid arthritis, unspecified<br>M32 Systemic lupus erythematosus<br>M332 Polymyositis<br>M353 Polymyalgia rheumatica<br>M34 Systemic sclerosis                                                  |
| Decompensated liver disease                              | C22.0 hepatocellular carcinoma<br><br>I85.0 Oesophageal varices<br>I98.3 Oesophageal varices<br>K70.4 Alcoholic hepatic failure<br>K72.0 Acute and subacute failure of the liver                                                                                                                                                                                                                                                                                                                                                                        |

K72.1 Chronic hepatic failure  
 K72.9 Hepatic coma  
 K76.7 hepatorenal syndrome  
 R18 Ascites

Kidney disease

Advanced Chronic kidney disease or RRT N18.3 Chronic kidney disease stage 3  
 N18.4 Chronic kidney disease stage 4  
 N18.5 Chronic kidney disease stage 5  
 Z490 Care involving dialysis  
 Z491 Care involving dialysis  
 Z492 Care involving dialysis  
 Z940 Kidney transplant status  
 Z992 Dependence on renal dialysis

Other chronic kidney disease

N00-N08 Glomerular diseases  
 N10-N16 Renal Tubulo-interstitial disease  
 N18.1 Chronic kidney disease stage 1  
 N18.2 Chronic kidney disease stage 2  
 N18.9 Chronic kidney disease unspecified

Diabetes

E10 Type 1 diabetes mellitus  
 E11 Type 2 diabetes mellitus  
 E12 Malnutrition-related diabetes mellitus  
 E13 Other specified diabetes mellitus  
 E14 Unspecified diabetes mellitus

Malignant neoplasms

Lung cancers C00-C97  
 Blood cancers C34 Malignant neoplasm of bronchus and lung  
 C81-C96 Malignant neoplasms, stated or presumed to be primary, of lymphoid, haematopoietic and related tissue  
 Other cancers Everything else in C00-97 except c34 and C81-C96

Immunological disease

HIV B20 –B23 Human immunodeficiency virus [HIV] disease

Certain disorders involving the immune system

D80-D89 Certain disorders involving the immune system

Sickle cell disease

SCD D57 Sickle-cell disorders

Cystic fibrosis E84 Cystic fibrosis

Organ transplantation other than kidney

Organ transplantation Z941-Z949

**Supplementary table A: Baseline characteristics of healthcare workers in patient facing roles stratified by front door, intensive care, specialties exposed to aerosolized generating procedures and other**

|                                              | Front door    | ICU          | AGP (non-ICU) | Other         |
|----------------------------------------------|---------------|--------------|---------------|---------------|
| <b>Number, n (%)</b>                         | 49411         | 1348         | 4231          | 35743         |
| <b>Age, mean(sd)</b>                         | 42.87 (11.65) | 41.49 (9.9)  | 41.19 (10.72) | 44.07 (11.4)  |
| <b>Sex n(%)</b>                              |               |              |               |               |
| Female                                       | 40820 (82.6%) | 593 (44%)    | 3396 (80.3%)  | 27637 (77.3%) |
| <b>SIMD Quintile n(%)</b>                    |               |              |               |               |
| 1 (least deprived)                           | 7560 (15.3%)  | 33 (2.4%)    | 238 (5.6%)    | 4567 (12.8%)  |
| 2                                            | 9524 (19.3%)  | 71 (5.3%)    | 466 (11%)     | 6395 (17.9%)  |
| 3                                            | 9961 (20.2%)  | 143 (10.6%)  | 811 (19.2%)   | 7263 (20.3%)  |
| 4                                            | 11150 (22.6%) | 365 (27.1%)  | 1152 (27.2%)  | 8460 (23.7%)  |
| 5 (most deprived)                            | 11216 (22.7%) | 736 (54.6%)  | 1564 (37%)    | 9058 (25.3%)  |
| <b>Ethnic group, n(%)</b>                    |               |              |               |               |
| White                                        | 47775 (96.7%) | 1200 (89%)   | 4064 (96.1%)  | 34283 (95.9%) |
| South Asian                                  | 1064 (2.2%)   | 121 (9%)     | 128 (3%)      | 1039 (2.9%)   |
| Black                                        | 251 (0.5%)    | 7 (0.5%)     | 5 (0.1%)      | 174 (0.5%)    |
| Chinese                                      | 160 (0.3%)    | 13 (1%)      | 18 (0.4%)     | 116 (0.3%)    |
| Other                                        | 161 (0.3%)    | 7 (0.5%)     | 16 (0.4%)     | 131 (0.4%)    |
| <b>Comorbidity, n(%)</b>                     |               |              |               |               |
| Ischaemic heart disease                      | 435 (6.7%)    | 7 (5.9%)     | 18 (5.4%)     | 355 (7.7%)    |
| Other heart disease                          | 1164 (17.9%)  | 25 (21%)     | 59 (17.7%)    | 812 (17.5%)   |
| Other circulatory system diseases            | 828 (12.8%)   | 17 (14.3%)   | 32 (9.6%)     | 493 (10.6%)   |
| Advanced chronic kidney disease              | 27 (0.4%)     | 1 (0.8%)     | 2 (0.6%)      | 20 (0.4%)     |
| Asthma and chronic lower respiratory disease | 1103 (17%)    | 20 (16.8%)   | 36 (10.8%)    | 714 (15.4%)   |
| Neurological disorders                       | 221 (3.4%)    | 7 (5.9%)     | 17 (5.1%)     | 144 (3.1%)    |
| Decompensated liver disease                  | 29 (0.4%)     | 0 (0%)       | 0 (0%)        | 25 (0.5%)     |
| Malignant Neoplasms                          | 1662 (25.6%)  | 40 (33.6%)   | 125 (37.4%)   | 1243 (26.8%)  |
| Disorders of esophagus, stomach and duodenum | 1259 (19.4%)  | 20 (16.8%)   | 47 (14.1%)    | 834 (18%)     |
| Diabetes, type 1                             | 337 (5.2%)    | 5 (4.2%)     | 29 (8.7%)     | 233 (5%)      |
| Diabetes, type 2                             | 960 (14.8%)   | 11 (9.2%)    | 27 (8.1%)     | 849 (18.3%)   |
| Diabetes (type unknown)                      | 74 (0.1%)     | 0 (0%)       | 1 (0%)        | 71 (0.2%)     |
| <b>Comorbidity count, n(%)</b>               |               |              |               |               |
| 0                                            | 42923 (86.9%) | 1229 (91.2%) | 3897 (92.1%)  | 31106 (87%)   |
| 1                                            | 5216 (10.6%)  | 99 (7.3%)    | 287 (6.8%)    | 3750 (10.5%)  |
| >= 2                                         | 1272 (2.6%)   | 20 (1.5%)    | 47 (1.1%)     | 887 (2.5%)    |
| <b>Immigration Status, n(%)</b>              |               |              |               |               |

|                                 |               |              |              |               |
|---------------------------------|---------------|--------------|--------------|---------------|
| UK National                     | 44130 (89.3%) | 1306 (96.9%) | 4214 (99.6%) | 35482 (99.3%) |
| Non UK National                 | 277 (0.6%)    | 42 (3.1%)    | 17 (0.4%)    | 261 (0.7%)    |
| <b>Whole or Part Time, n(%)</b> |               |              |              |               |
| Whole time                      | 25376 (51.4%) | 1218 (90.4%) | 2227 (52.6%) | 22360 (62.6%) |
| Part time                       | 19031 (38.5%) | 130 (9.6%)   | 2004 (47.4%) | 13383 (37.4%) |

Abbreviation: SIMD – Scottish Index of Multiple Deprivation; AGP – Aerosolised generating procedure. Immigration status and whole or part time status are not included in the GPCD database hence the percentages do not sum to 100% for these variables.

**Supplementary table B: Model coefficients for healthcare workers**

These tables show the complete set of regression models run as part of these analyses including sensitivity analyses. They are available in comma-separated (CSV) file formats in our public github repository (<https://github.com/ChronicDiseaseEpi/hcw>).

These coefficients and confidence intervals are provided in the interests of transparency to allow readers to judge the models presented and to view the additional models fitted as part of the wider analyses. Many of these models include sensitivity analyses, and so included groups with smaller numbers and/or included interaction terms. Therefore, the results presented in these tables should be interpreted with considerable caution. They should be examined alongside the R code used to fit the models (<https://github.com/ChronicDiseaseEpi/hcw>).

ps - penalised spline

**Cox models**

| Model      | Parameters       | Estimate and 95% Confidence interval |
|------------|------------------|--------------------------------------|
| agesex     | ps(age10)3       | 0.80 (0.47-1.35)                     |
| agesex     | ps(age10)4       | 0.64 (0.22-1.83)                     |
| agesex     | ps(age10)5       | 0.54 (0.12-2.52)                     |
| agesex     | ps(age10)6       | 0.60 (0.10-3.59)                     |
| agesex     | ps(age10)7       | 0.85 (0.14-5.31)                     |
| agesex     | ps(age10)8       | 1.35 (0.23-7.99)                     |
| agesex     | ps(age10)9       | 1.78 (0.32-10.11)                    |
| agesex     | ps(age10)10      | 1.97 (0.35-11.02)                    |
| agesex     | ps(age10)11      | 2.32 (0.41-13.03)                    |
| agesex     | ps(age10)12      | 2.60 (0.46-14.68)                    |
| agesex     | ps(age10)13      | 2.88 (0.49-16.98)                    |
| agesex     | ps(age10)14      | 3.19 (0.48-21.25)                    |
| agesex     | male             | 1.59 (1.22-2.08)                     |
| agesex     | rolepf_any       | 3.31 (2.13-5.13)                     |
| agesex     | roleundetermined | 1.64 (0.99-2.72)                     |
| ethnicsimd | ps(age10)3       | 0.82 (0.49-1.37)                     |
| ethnicsimd | ps(age10)4       | 0.66 (0.23-1.88)                     |
| ethnicsimd | ps(age10)5       | 0.57 (0.12-2.62)                     |
| ethnicsimd | ps(age10)6       | 0.64 (0.11-3.77)                     |
| ethnicsimd | ps(age10)7       | 0.92 (0.15-5.63)                     |
| ethnicsimd | ps(age10)8       | 1.46 (0.25-8.51)                     |
| ethnicsimd | ps(age10)9       | 1.92 (0.34-10.69)                    |
| ethnicsimd | ps(age10)10      | 2.09 (0.38-11.50)                    |
| ethnicsimd | ps(age10)11      | 2.42 (0.44-13.41)                    |
| ethnicsimd | ps(age10)12      | 2.64 (0.47-14.72)                    |

|             |                  |                   |
|-------------|------------------|-------------------|
| ethnicsimd  | ps(age10)13      | 2.84 (0.49-16.50) |
| ethnicsimd  | ps(age10)14      | 3.03 (0.46-20.01) |
| ethnicsimd  | male             | 1.64 (1.25-2.14)  |
| ethnicsimd  | rolepf_any       | 3.29 (2.12-5.10)  |
| ethnicsimd  | roleundetermined | 1.54 (0.93-2.57)  |
| ethnicsimd  | white            | 1.13 (0.53-2.41)  |
| ethnicsimd  | simd             | 0.81 (0.73-0.88)  |
| como        | ps(age10)3       | 0.81 (0.48-1.36)  |
| como        | ps(age10)4       | 0.66 (0.23-1.86)  |
| como        | ps(age10)5       | 0.56 (0.12-2.59)  |
| como        | ps(age10)6       | 0.63 (0.11-3.70)  |
| como        | ps(age10)7       | 0.90 (0.15-5.49)  |
| como        | ps(age10)8       | 1.40 (0.24-8.18)  |
| como        | ps(age10)9       | 1.80 (0.32-10.05) |
| como        | ps(age10)10      | 1.91 (0.35-10.51) |
| como        | ps(age10)11      | 2.14 (0.39-11.89) |
| como        | ps(age10)12      | 2.25 (0.40-12.58) |
| como        | ps(age10)13      | 2.31 (0.39-13.50) |
| como        | ps(age10)14      | 2.35 (0.35-15.66) |
| como        | male             | 1.56 (1.19-2.04)  |
| como        | rolepf_any       | 3.30 (2.13-5.13)  |
| como        | roleundetermined | 1.55 (0.93-2.59)  |
| como        | white            | 1.21 (0.57-2.60)  |
| como        | simd             | 0.82 (0.75-0.90)  |
| como        | como_count       | 1.23 (1.03-1.46)  |
| como        | t2dm             | 2.08 (1.23-3.52)  |
| ethnicalone | ps(age10)3       | 0.82 (0.50-1.34)  |
| ethnicalone | ps(age10)4       | 0.67 (0.25-1.80)  |
| ethnicalone | ps(age10)5       | 0.57 (0.13-2.44)  |
| ethnicalone | ps(age10)6       | 0.62 (0.11-3.40)  |
| ethnicalone | ps(age10)7       | 0.86 (0.15-4.91)  |
| ethnicalone | ps(age10)8       | 1.33 (0.24-7.24)  |
| ethnicalone | ps(age10)9       | 1.74 (0.33-9.08)  |
| ethnicalone | ps(age10)10      | 1.91 (0.37-9.85)  |
| ethnicalone | ps(age10)11      | 2.20 (0.42-11.38) |
| ethnicalone | ps(age10)12      | 2.34 (0.45-12.19) |
| ethnicalone | ps(age10)13      | 2.44 (0.45-13.27) |
| ethnicalone | ps(age10)14      | 2.53 (0.41-15.64) |
| ethnicalone | male             | 1.61 (1.23-2.11)  |
| ethnicalone | white            | 1.12 (0.53-2.39)  |
| occupation  | ps(age10)3       | 0.81 (0.48-1.36)  |
| occupation  | ps(age10)4       | 0.66 (0.23-1.86)  |
| occupation  | ps(age10)5       | 0.56 (0.12-2.58)  |
| occupation  | ps(age10)6       | 0.62 (0.11-3.69)  |
| occupation  | ps(age10)7       | 0.89 (0.15-5.47)  |

|            |                           |                   |
|------------|---------------------------|-------------------|
| occupation | ps(age10)8                | 1.40 (0.24-8.16)  |
| occupation | ps(age10)9                | 1.79 (0.32-10.03) |
| occupation | ps(age10)10               | 1.90 (0.34-10.48) |
| occupation | ps(age10)11               | 2.13 (0.38-11.88) |
| occupation | ps(age10)12               | 2.25 (0.40-12.61) |
| occupation | ps(age10)13               | 2.32 (0.40-13.57) |
| occupation | ps(age10)14               | 2.37 (0.36-15.80) |
| occupation | male                      | 1.59 (1.21-2.09)  |
| occupation | rolepf_any                | 3.00 (1.68-5.36)  |
| occupation | roleundetermined          | 1.53 (0.91-2.56)  |
| occupation | white                     | 1.23 (0.57-2.62)  |
| occupation | simd                      | 0.82 (0.74-0.90)  |
| occupation | como_count                | 1.23 (1.03-1.46)  |
| occupation | t2dm                      | 2.09 (1.23-3.53)  |
| occupation | nurs_med_ahp              | 1.12 (0.72-1.73)  |
| parttime   | ps(age10)3                | 0.83 (0.49-1.42)  |
| parttime   | ps(age10)4                | 0.69 (0.24-2.01)  |
| parttime   | ps(age10)5                | 0.61 (0.13-2.90)  |
| parttime   | ps(age10)6                | 0.71 (0.12-4.30)  |
| parttime   | ps(age10)7                | 1.03 (0.16-6.53)  |
| parttime   | ps(age10)8                | 1.62 (0.27-9.74)  |
| parttime   | ps(age10)9                | 2.06 (0.36-11.80) |
| parttime   | ps(age10)10               | 2.16 (0.38-12.23) |
| parttime   | ps(age10)11               | 2.45 (0.43-13.99) |
| parttime   | ps(age10)12               | 2.64 (0.46-15.17) |
| parttime   | ps(age10)13               | 2.78 (0.46-16.79) |
| parttime   | ps(age10)14               | 2.90 (0.42-20.12) |
| parttime   | male                      | 1.47 (1.10-1.96)  |
| parttime   | rolepf_any                | 3.06 (1.73-5.43)  |
| parttime   | roleundetermined          | 1.60 (0.96-2.69)  |
| parttime   | white                     | 1.21 (0.57-2.59)  |
| parttime   | simd                      | 0.83 (0.75-0.91)  |
| parttime   | como_count                | 1.23 (1.03-1.46)  |
| parttime   | t2dm                      | 2.05 (1.21-3.46)  |
| parttime   | nurs_med_ahp              | 1.13 (0.74-1.74)  |
| parttime   | part_timep                | 0.75 (0.56-1.00)  |
| parttime   | part_timegeneral practice | 0.44 (0.16-1.18)  |
| gradeafc   | ps(age10)3                | 0.75 (0.45-1.27)  |
| gradeafc   | ps(age10)4                | 0.56 (0.20-1.61)  |
| gradeafc   | ps(age10)5                | 0.45 (0.10-2.08)  |
| gradeafc   | ps(age10)6                | 0.47 (0.08-2.86)  |
| gradeafc   | ps(age10)7                | 0.65 (0.10-4.13)  |
| gradeafc   | ps(age10)8                | 1.04 (0.17-6.26)  |
| gradeafc   | ps(age10)9                | 1.43 (0.25-8.13)  |
| gradeafc   | ps(age10)10               | 1.61 (0.29-8.97)  |

|          |                           |                        |
|----------|---------------------------|------------------------|
| gradeafc | ps(age10)11               | 1.84 (0.33-10.35)      |
| gradeafc | ps(age10)12               | 1.97 (0.35-11.11)      |
| gradeafc | ps(age10)13               | 2.09 (0.35-12.48)      |
| gradeafc | ps(age10)14               | 2.23 (0.32-15.44)      |
| gradeafc | male                      | 1.32 (0.96-1.82)       |
| gradeafc | rolepf_any                | 2.94 (1.59-5.45)       |
| gradeafc | roleundetermined          | 1.66 (0.99-2.79)       |
| gradeafc | white                     | 1.30 (0.41-4.09)       |
| gradeafc | simd                      | 0.80 (0.72-0.90)       |
| gradeafc | como_count                | 1.26 (1.06-1.50)       |
| gradeafc | t2dm                      | 2.00 (1.18-3.42)       |
| gradeafc | nurs_med_ahp              | 1.12 (0.71-1.78)       |
| gradeafc | part_timep                | 0.67 (0.50-0.91)       |
| gradeafc | part_timegeneral practice |                        |
| gradeafc | grade5-7                  | 1.03 (0.75-1.41)       |
| gradeafc | grade8+                   | 1.18 (0.53-2.62)       |
| grademed | ps(age)3                  | 3.42 (2.23-5.24)       |
| grademed | ps(age)4                  | 11.62 (4.94-27.37)     |
| grademed | ps(age)5                  | 31.68 (7.92-126.70)    |
| grademed | ps(age)6                  | 66.57 (7.79-568.67)    |
| grademed | ps(age)7                  | 134.16 (12.32-1460.40) |
| grademed | ps(age)8                  | 172.11 (18.98-1560.42) |
| grademed | ps(age)9                  | 121.55 (13.98-1056.54) |
| grademed | ps(age)10                 | 70.52 (7.57-656.66)    |
| grademed | ps(age)11                 | 56.89 (5.42-597.19)    |
| grademed | ps(age)12                 | 61.05 (4.25-876.14)    |
| grademed | ps(age)13                 | 70.34 (2.37-2088.26)   |
| grademed | ps(age)14                 | 78.64 (1.05-5874.62)   |
| grademed | male                      | 2.58 (1.06-6.29)       |
| grademed | simd                      | 1.07 (0.68-1.68)       |
| grademed | gradespecialty_assoc_spec | 0.83 (0.11-6.47)       |
| grademed | gradetraining_grade       | 2.02 (0.71-5.77)       |
| pt       | ps(age10)3                | 0.83 (0.49-1.42)       |
| pt       | ps(age10)4                | 0.69 (0.24-2.01)       |
| pt       | ps(age10)5                | 0.61 (0.13-2.90)       |
| pt       | ps(age10)6                | 0.71 (0.12-4.30)       |
| pt       | ps(age10)7                | 1.03 (0.16-6.53)       |
| pt       | ps(age10)8                | 1.62 (0.27-9.74)       |
| pt       | ps(age10)9                | 2.06 (0.36-11.80)      |
| pt       | ps(age10)10               | 2.16 (0.38-12.23)      |
| pt       | ps(age10)11               | 2.45 (0.43-13.99)      |
| pt       | ps(age10)12               | 2.64 (0.46-15.17)      |
| pt       | ps(age10)13               | 2.78 (0.46-16.79)      |
| pt       | ps(age10)14               | 2.90 (0.42-20.12)      |
| pt       | male                      | 1.47 (1.10-1.96)       |



|              |                           |                    |
|--------------|---------------------------|--------------------|
| pt           | rolepf_any                | 3.06 (1.73-5.43)   |
| pt           | roleundetermined          | 1.60 (0.96-2.69)   |
| pt           | white                     | 1.21 (0.57-2.59)   |
| pt           | simd                      | 0.83 (0.75-0.91)   |
| pt           | como_count                | 1.23 (1.03-1.46)   |
| pt           | t2dm                      | 2.05 (1.21-3.46)   |
| pt           | nurs_med_ahp              | 1.13 (0.74-1.74)   |
| pt           | part_timep                | 0.75 (0.56-1.00)   |
| pt           | part_timegeneral practice | 0.44 (0.16-1.18)   |
| immigration  | ps(age10)3                | 0.82 (0.49-1.40)   |
| immigration  | ps(age10)4                | 0.68 (0.23-1.95)   |
| immigration  | ps(age10)5                | 0.59 (0.12-2.77)   |
| immigration  | ps(age10)6                | 0.66 (0.11-4.02)   |
| immigration  | ps(age10)7                | 0.94 (0.15-5.90)   |
| immigration  | ps(age10)8                | 1.49 (0.25-8.87)   |
| immigration  | ps(age10)9                | 1.96 (0.35-11.14)  |
| immigration  | ps(age10)10               | 2.10 (0.37-11.75)  |
| immigration  | ps(age10)11               | 2.38 (0.42-13.39)  |
| immigration  | ps(age10)12               | 2.55 (0.45-14.49)  |
| immigration  | ps(age10)13               | 2.69 (0.45-16.09)  |
| immigration  | ps(age10)14               | 2.82 (0.41-19.36)  |
| immigration  | male                      | 1.42 (1.06-1.91)   |
| immigration  | rolepf_any                | 3.09 (1.74-5.48)   |
| immigration  | roleundetermined          | 1.60 (0.96-2.69)   |
| immigration  | simd                      | 0.82 (0.74-0.90)   |
| immigration  | como_count                | 1.24 (1.04-1.47)   |
| immigration  | t2dm                      | 2.00 (1.18-3.37)   |
| immigration  | nurs_med_ahp              | 1.11 (0.72-1.71)   |
| immigration  | part_timep                | 0.74 (0.56-1.00)   |
| immigration  | part_timegeneral practice |                    |
| immigration  | immigration               | 2.27 (0.73-7.11)   |
| ageroleinter | ps(age10)3                | 0.88 (0.51-1.50)   |
| ageroleinter | ps(age10)4                | 0.77 (0.26-2.25)   |
| ageroleinter | ps(age10)5                | 0.72 (0.15-3.44)   |
| ageroleinter | ps(age10)6                | 0.88 (0.14-5.46)   |
| ageroleinter | ps(age10)7                | 1.37 (0.21-9.10)   |
| ageroleinter | ps(age10)8                | 2.27 (0.34-15.20)  |
| ageroleinter | ps(age10)9                | 3.04 (0.45-20.57)  |
| ageroleinter | ps(age10)10               | 3.35 (0.47-23.79)  |
| ageroleinter | ps(age10)11               | 3.98 (0.52-30.32)  |
| ageroleinter | ps(age10)12               | 4.45 (0.55-36.15)  |
| ageroleinter | ps(age10)13               | 4.81 (0.53-43.73)  |
| ageroleinter | ps(age10)14               | 5.18 (0.47-56.64)  |
| ageroleinter | male                      | 1.48 (1.11-1.98)   |
| ageroleinter | rolepf_any                | 8.34 (0.65-107.64) |

|               |                           |                        |
|---------------|---------------------------|------------------------|
| ageroleinter  | roleundetermined          | 2.10 (0.11-40.94)      |
| ageroleinter  | white                     | 1.21 (0.57-2.59)       |
| ageroleinter  | simd                      | 0.83 (0.75-0.91)       |
| ageroleinter  | como_count                | 1.23 (1.03-1.46)       |
| ageroleinter  | t2dm                      | 2.04 (1.21-3.46)       |
| ageroleinter  | nurs_med_ahp              | 1.13 (0.74-1.74)       |
| ageroleinter  | part_timep                | 0.75 (0.56-1.00)       |
| ageroleinter  | part_timegeneral practice | 0.44 (0.16-1.17)       |
| ageroleinter  | rolenpf:age10             | 1.05 (0.60-1.86)       |
| ageroleinter  | rolepf_any:age10          | 0.87 (0.61-1.23)       |
| ageroleinter  | roleundetermined:age10    |                        |
| sexroleinter  | ps(age10)3                | 0.84 (0.49-1.42)       |
| sexroleinter  | ps(age10)4                | 0.70 (0.24-2.02)       |
| sexroleinter  | ps(age10)5                | 0.62 (0.13-2.93)       |
| sexroleinter  | ps(age10)6                | 0.72 (0.12-4.37)       |
| sexroleinter  | ps(age10)7                | 1.06 (0.17-6.64)       |
| sexroleinter  | ps(age10)8                | 1.66 (0.28-9.91)       |
| sexroleinter  | ps(age10)9                | 2.10 (0.37-12.02)      |
| sexroleinter  | ps(age10)10               | 2.21 (0.39-12.46)      |
| sexroleinter  | ps(age10)11               | 2.51 (0.44-14.23)      |
| sexroleinter  | ps(age10)12               | 2.69 (0.47-15.36)      |
| sexroleinter  | ps(age10)13               | 2.81 (0.47-16.96)      |
| sexroleinter  | ps(age10)14               | 2.94 (0.43-20.28)      |
| sexroleinter  | male                      | 1.13 (0.42-3.05)       |
| sexroleinter  | rolepf_any                | 2.96 (1.55-5.66)       |
| sexroleinter  | roleundetermined          | 1.17 (0.61-2.26)       |
| sexroleinter  | white                     | 1.20 (0.56-2.55)       |
| sexroleinter  | simd                      | 0.83 (0.75-0.91)       |
| sexroleinter  | como_count                | 1.23 (1.03-1.46)       |
| sexroleinter  | t2dm                      | 2.04 (1.21-3.46)       |
| sexroleinter  | nurs_med_ahp              | 1.14 (0.72-1.79)       |
| sexroleinter  | part_timep                | 0.75 (0.57-1.01)       |
| sexroleinter  | part_timegeneral practice | 0.45 (0.17-1.21)       |
| sexroleinter  | male:rolepf_any           | 1.17 (0.41-3.34)       |
| sexroleinter  | male:roleundetermined     | 2.28 (0.70-7.47)       |
| sexrolefemale | ps(age10)3                | 2.85 (1.81-4.49)       |
| sexrolefemale | ps(age10)4                | 8.13 (3.28-20.14)      |
| sexrolefemale | ps(age10)5                | 22.86 (5.76-90.68)     |
| sexrolefemale | ps(age10)6                | 56.08 (7.76-405.18)    |
| sexrolefemale | ps(age10)7                | 118.86 (10.20-1384.81) |
| sexrolefemale | ps(age10)8                | 218.31 (16.95-2811.59) |
| sexrolefemale | ps(age10)9                | 255.84 (22.29-2937.00) |
| sexrolefemale | ps(age10)10               | 202.06 (19.18-2128.91) |
| sexrolefemale | ps(age10)11               | 207.21 (19.74-2175.31) |
| sexrolefemale | ps(age10)12               | 250.44 (23.72-2643.78) |

|             |                           |                        |
|-------------|---------------------------|------------------------|
| sexrolemale | ps(age10)13               | 347.01 (29.82-4037.78) |
| sexrolemale | ps(age10)14               | 510.15 (30.38-8567.58) |
| sexrolemale | rolepf_any                | 4.18 (1.49-11.70)      |
| sexrolemale | roleundetermined          | 2.79 (1.02-7.60)       |
| sexrolemale | white                     | 0.94 (0.37-2.36)       |
| sexrolemale | simd                      | 0.95 (0.80-1.12)       |
| sexrolemale | como_count                | 1.11 (0.83-1.49)       |
| sexrolemale | t2dm                      | 1.99 (0.87-4.56)       |
| sexrolemale | nurs_med_ahp              | 0.84 (0.46-1.52)       |
| sexrolemale | part_timep                | 0.89 (0.47-1.71)       |
| sexrolemale | part_timegeneral practice | 0.63 (0.20-2.05)       |
| sexrolemale | ps(age10)3                | 0.71 (0.40-1.25)       |
| sexrolemale | ps(age10)4                | 0.50 (0.16-1.56)       |
| sexrolemale | ps(age10)5                | 0.38 (0.07-2.00)       |
| sexrolemale | ps(age10)6                | 0.39 (0.06-2.68)       |
| sexrolemale | ps(age10)7                | 0.53 (0.07-3.69)       |
| sexrolemale | ps(age10)8                | 0.77 (0.12-5.05)       |
| sexrolemale | ps(age10)9                | 0.99 (0.16-6.18)       |
| sexrolemale | ps(age10)10               | 1.18 (0.19-7.18)       |
| sexrolemale | ps(age10)11               | 1.40 (0.23-8.61)       |
| sexrolemale | ps(age10)12               | 1.39 (0.22-8.71)       |
| sexrolemale | ps(age10)13               | 1.24 (0.18-8.43)       |
| sexrolemale | ps(age10)14               | 1.08 (0.13-8.67)       |
| sexrolemale | rolepf_any                | 2.27 (1.04-4.96)       |
| sexrolemale | roleundetermined          | 1.10 (0.56-2.16)       |
| sexrolemale | white                     | 1.86 (0.46-7.59)       |
| sexrolemale | simd                      | 0.78 (0.69-0.88)       |
| sexrolemale | como_count                | 1.29 (1.04-1.61)       |
| sexrolemale | t2dm                      | 2.21 (1.13-4.32)       |
| sexrolemale | nurs_med_ahp              | 1.53 (0.78-2.99)       |
| sexrolemale | part_timep                | 0.75 (0.54-1.02)       |
| sexrolemale | part_timegeneral practice | 0.24 (0.03-1.74)       |
| subrole     | ps(age10)3                | 0.70 (0.18-2.76)       |
| subrole     | ps(age10)4                | 0.49 (0.05-4.72)       |
| subrole     | ps(age10)5                | 0.37 (0.03-5.40)       |
| subrole     | ps(age10)6                | 0.40 (0.03-6.25)       |
| subrole     | ps(age10)7                | 0.64 (0.04-9.43)       |
| subrole     | ps(age10)8                | 1.10 (0.08-15.54)      |
| subrole     | ps(age10)9                | 1.39 (0.10-19.31)      |
| subrole     | ps(age10)10               | 1.27 (0.09-17.66)      |
| subrole     | ps(age10)11               | 1.35 (0.10-18.80)      |
| subrole     | ps(age10)12               | 1.67 (0.12-23.39)      |
| subrole     | ps(age10)13               | 1.89 (0.13-27.92)      |
| subrole     | ps(age10)14               | 2.05 (0.10-40.87)      |
| subrole     | male                      | 1.41 (0.98-2.04)       |

|         |                           |                  |
|---------|---------------------------|------------------|
| subrole | role_subpf_front          | 2.09 (1.49-2.94) |
| subrole | role_subpf_resp_oro_agp   | 1.91 (0.90-4.07) |
| subrole | role_subpf_icu            | 1.22 (0.29-5.09) |
| subrole | white                     | 0.96 (0.44-2.06) |
| subrole | simd                      | 0.86 (0.77-0.96) |
| subrole | como_count                | 1.22 (0.96-1.55) |
| subrole | t2dm                      | 2.25 (1.23-4.12) |
| subrole | nurs_med_ahp              | 1.08 (0.57-2.03) |
| subrole | part_timep                | 0.69 (0.50-0.97) |
| subrole | part_timegeneral practice | 0.31 (0.11-0.87) |

***Conditional logistic regression models***

| Model      | Parameters     | Estimate and 95% confidence interval |
|------------|----------------|--------------------------------------|
| agesex     | rolepopulation | 0.92 (0.59-1.42)                     |
| ethnicsimd | rolepopulation | 0.90 (0.58-1.40)                     |
| ethnicsimd | white          | 1.47 (0.86-2.50)                     |
| ethnicsimd | simd           | 0.87 (0.83-0.91)                     |
| como       | rolepopulation | 0.81 (0.52-1.26)                     |
| como       | white          | 1.70 (1.00-2.92)                     |
| como       | simd           | 0.91 (0.87-0.95)                     |
| como       | como_count     | 1.76 (1.68-1.84)                     |

*Supplementary table C: Risk of COVID-19 hospitalization within healthcare workers comparing occupational role (nursing and midwifery occupational role as the referent)*

|                                                                         | Nursing and midwifery | Medical, other   | Medical, general practice | Allied health professional | Support services | Administrative services | Other            |
|-------------------------------------------------------------------------|-----------------------|------------------|---------------------------|----------------------------|------------------|-------------------------|------------------|
| <b>Hospitalized (n)</b>                                                 | 125                   | 20               | 4                         | 27                         | 30               | 19                      | 18               |
| <b>Total population (n)</b>                                             | 64560                 | 11513            | 5004                      | 14046                      | 16661            | 28532                   | 18129            |
| <b>Risk (%)</b>                                                         | 0.19                  | 0.17             | 0.08                      | 0.19                       | 0.18             | 0.07                    | 0.1              |
| <b>Model 1, Age, sex and role</b>                                       | 1                     | 0.93 (0.57-1.52) | 0.37 (0.14-0.99)          | 1.05 (0.69-1.59)           | 1.28 (0.78-2.09) | 0.76 (0.25-2.30)        | 0.88 (0.49-1.58) |
| <b>Model 2, as model 1 plus socioeconomic deprivation and ethnicity</b> | 1                     | 1.28 (0.76-2.17) | 0.49 (0.18-1.32)          | 1.18 (0.78-1.81)           | 1.06 (0.64-1.75) | 0.71 (0.23-2.15)        | 0.89 (0.50-1.61) |
| <b>Model 3, as model 2, plus comorbidity</b>                            | 1                     | 1.34 (0.79-2.26) | 0.53 (0.20-1.40)          | 1.22 (0.80-1.86)           | 1.03 (0.62-1.71) | 0.70 (0.23-2.12)        | 0.90 (0.50-1.62) |
| <b>Model 4, as model 4 plus part time status</b>                        | 1                     | 1.31 (0.77-2.21) | 0.48 (0.18-1.28)          | 1.23 (0.80-1.87)           | 1.07 (0.65-1.76) | 0.69 (0.23-2.08)        | 0.87 (0.48-1.55) |

**Supplementary table D: Model coefficients for household members**

These tables show the complete set of regression models run as part of these analyses including sensitivity analyses. They are available in comma-separated (CSV) file formats in our public github repository (<https://github.com/ChronicDiseaseEpi/hcw>). They should be interpreted with the same caveats noted in Supplementary table 2

**Cox models**

| Model       | Parameters       | Estimate and 95% confidence interval |
|-------------|------------------|--------------------------------------|
| agesex      | ps(age10)3       | 1.02 (0.37-2.82)                     |
| agesex      | ps(age10)4       | 1.13 (0.17-7.70)                     |
| agesex      | ps(age10)5       | 1.60 (0.14-18.16)                    |
| agesex      | ps(age10)6       | 3.15 (0.24-40.75)                    |
| agesex      | ps(age10)7       | 8.41 (0.68-103.66)                   |
| agesex      | ps(age10)8       | 21.21 (1.84-245.13)                  |
| agesex      | ps(age10)9       | 33.21 (2.92-378.18)                  |
| agesex      | ps(age10)10      | 33.08 (2.88-380.55)                  |
| agesex      | ps(age10)11      | 37.48 (3.17-442.90)                  |
| agesex      | ps(age10)12      | 46.35 (3.62-593.22)                  |
| agesex      | ps(age10)13      | 51.36 (3.55-742.60)                  |
| agesex      | ps(age10)14      | 55.87 (3.25-959.51)                  |
| agesex      | male             | 2.06 (1.35-3.13)                     |
| agesex      | rolepf_any       | 1.81 (1.11-2.94)                     |
| agesex      | roleundetermined | 1.68 (0.95-2.95)                     |
| agesex_kids | ps(age10)3       | 0.02 (0.00-0.08)                     |
| agesex_kids | ps(age10)4       | 0.00 (0.00-0.01)                     |
| agesex_kids | ps(age10)5       | 0.00 (0.00-0.00)                     |
| agesex_kids | ps(age10)6       | 0.00 (0.00-0.00)                     |
| agesex_kids | ps(age10)7       | 0.00 (0.00-0.00)                     |
| agesex_kids | ps(age10)8       | 0.00 (0.00-0.03)                     |
| agesex_kids | ps(age10)9       | 0.01 (0.00-0.21)                     |
| agesex_kids | ps(age10)10      | 0.00 (0.00-0.10)                     |
| agesex_kids | ps(age10)11      | 0.00 (0.00-0.14)                     |
| agesex_kids | ps(age10)12      | 0.00 (0.00-0.06)                     |
| agesex_kids | ps(age10)13      | 0.00 (0.00-0.01)                     |
| agesex_kids | ps(age10)14      | 0.00 (0.00-0.00)                     |
| agesex_kids | male             | 3.80 (0.44-32.73)                    |
| agesex_kids | rolepf_any       | 0.36 (0.06-2.15)                     |
| agesex_kids | roleundetermined | NA ( NA- NA)                         |
| agesex_gt65 | ps(age10)3       | 2.07 (0.58-7.43)                     |
| agesex_gt65 | ps(age10)4       | 4.04 (0.38-43.41)                    |
| agesex_gt65 | ps(age10)5       | 4.35 (0.32-59.32)                    |
| agesex_gt65 | ps(age10)6       | 4.03 (0.34-47.78)                    |
| agesex_gt65 | ps(age10)7       | 4.66 (0.41-52.47)                    |
| agesex_gt65 | ps(age10)8       | 5.36 (0.53-54.04)                    |
| agesex_gt65 | ps(age10)9       | 9.44 (0.85-105.32)                   |
| agesex_gt65 | ps(age10)10      | 12.17 (0.99-149.71)                  |
| agesex_gt65 | ps(age10)11      | 6.66 (0.54-82.38)                    |
| agesex_gt65 | ps(age10)12      | 2.24 (0.20-25.69)                    |
| agesex_gt65 | ps(age10)13      | 0.69 (0.06-8.00)                     |
| agesex_gt65 | ps(age10)14      | 0.21 (0.02-2.79)                     |
| agesex_gt65 | male             | 1.60 (0.62-4.13)                     |

|             |                  |                     |
|-------------|------------------|---------------------|
| agesex_gt65 | rolepf_any       | 1.81 (0.54-6.06)    |
| agesex_gt65 | roleundetermined | 1.42 (0.33-6.17)    |
| ethnicsimd  | ps(age10)3       | 1.01 (0.37-2.81)    |
| ethnicsimd  | ps(age10)4       | 1.11 (0.16-7.64)    |
| ethnicsimd  | ps(age10)5       | 1.57 (0.14-17.92)   |
| ethnicsimd  | ps(age10)6       | 3.08 (0.24-40.15)   |
| ethnicsimd  | ps(age10)7       | 8.26 (0.66-102.59)  |
| ethnicsimd  | ps(age10)8       | 20.93 (1.80-243.80) |
| ethnicsimd  | ps(age10)9       | 32.66 (2.84-375.31) |
| ethnicsimd  | ps(age10)10      | 32.15 (2.77-373.40) |
| ethnicsimd  | ps(age10)11      | 36.07 (3.02-430.53) |
| ethnicsimd  | ps(age10)12      | 44.39 (3.43-575.25) |
| ethnicsimd  | ps(age10)13      | 49.07 (3.34-720.75) |
| ethnicsimd  | ps(age10)14      | 53.27 (3.04-932.66) |
| ethnicsimd  | male             | 2.07 (1.36-3.15)    |
| ethnicsimd  | rolepf_any       | 1.79 (1.10-2.92)    |
| ethnicsimd  | roleundetermined | 1.63 (0.93-2.87)    |
| ethnicsimd  | white            | 0.80 (0.36-1.81)    |
| ethnicsimd  | simd             | 0.92 (0.81-1.04)    |
| ethnicalone | ps(age10)3       | 1.01 (0.37-2.81)    |
| ethnicalone | ps(age10)4       | 1.11 (0.16-7.65)    |
| ethnicalone | ps(age10)5       | 1.57 (0.14-18.01)   |
| ethnicalone | ps(age10)6       | 3.09 (0.24-40.37)   |
| ethnicalone | ps(age10)7       | 8.22 (0.66-102.20)  |
| ethnicalone | ps(age10)8       | 20.60 (1.77-240.07) |
| ethnicalone | ps(age10)9       | 31.99 (2.79-367.45) |
| ethnicalone | ps(age10)10      | 31.51 (2.72-365.04) |
| ethnicalone | ps(age10)11      | 35.56 (2.99-422.36) |
| ethnicalone | ps(age10)12      | 44.20 (3.43-569.03) |
| ethnicalone | ps(age10)13      | 49.42 (3.39-721.22) |
| ethnicalone | ps(age10)14      | 54.26 (3.11-945.06) |
| ethnicalone | male             | 2.04 (1.34-3.10)    |
| ethnicalone | white            | 0.80 (0.35-1.80)    |
| como        | ps(age10)3       | 1.01 (0.36-2.85)    |
| como        | ps(age10)4       | 1.11 (0.16-7.84)    |
| como        | ps(age10)5       | 1.57 (0.13-18.49)   |
| como        | ps(age10)6       | 3.08 (0.23-40.97)   |
| como        | ps(age10)7       | 7.95 (0.63-100.17)  |
| como        | ps(age10)8       | 18.08 (1.53-213.67) |
| como        | ps(age10)9       | 22.66 (1.94-265.42) |
| como        | ps(age10)10      | 17.51 (1.48-207.79) |
| como        | ps(age10)11      | 18.11 (1.48-221.04) |
| como        | ps(age10)12      | 24.75 (1.82-336.12) |
| como        | ps(age10)13      | 32.79 (2.00-536.27) |
| como        | ps(age10)14      | 42.88 (2.02-908.35) |
| como        | male             | 1.94 (1.27-2.96)    |
| como        | rolepf_any       | 1.78 (1.10-2.90)    |
| como        | roleundetermined | 1.60 (0.91-2.82)    |
| como        | white            | 0.92 (0.41-2.07)    |
| como        | simd             | 0.97 (0.85-1.09)    |
| como        | como_count       | 1.60 (1.27-2.01)    |
| como        | heart_other_any1 | 0.60 (0.30-1.21)    |
| como        | t2dm             | 2.02 (1.22-3.37)    |

|            |                              |                     |
|------------|------------------------------|---------------------|
| como       | unkdm                        | 4.84 (1.46-16.00)   |
| como       | ckd_any1                     | 4.39 (1.40-13.77)   |
| como       | oad_any1                     | 1.13 (0.52-2.46)    |
| occupation | ps(age10)3                   | 0.99 (0.35-2.80)    |
| occupation | ps(age10)4                   | 1.06 (0.15-7.59)    |
| occupation | ps(age10)5                   | 1.48 (0.12-17.76)   |
| occupation | ps(age10)6                   | 2.91 (0.21-39.81)   |
| occupation | ps(age10)7                   | 7.57 (0.58-98.17)   |
| occupation | ps(age10)8                   | 16.78 (1.38-203.81) |
| occupation | ps(age10)9                   | 20.55 (1.71-247.11) |
| occupation | ps(age10)10                  | 16.10 (1.32-196.25) |
| occupation | ps(age10)11                  | 17.20 (1.37-215.39) |
| occupation | ps(age10)12                  | 24.43 (1.76-339.99) |
| occupation | ps(age10)13                  | 33.70 (2.01-564.21) |
| occupation | ps(age10)14                  | 45.90 (2.12-994.59) |
| occupation | male                         | 1.90 (1.25-2.88)    |
| occupation | rolepf_any                   | 1.60 (0.53-4.82)    |
| occupation | roleundetermined             | 1.13 (0.36-3.53)    |
| occupation | white                        | 0.72 (0.32-1.64)    |
| occupation | simd                         | 1.03 (0.90-1.16)    |
| occupation | como_count                   | 1.60 (1.27-2.01)    |
| occupation | heart_other_any1             | 0.60 (0.30-1.20)    |
| occupation | t2dm                         | 1.96 (1.17-3.27)    |
| occupation | unkdm                        | 4.81 (1.45-15.93)   |
| occupation | ckd_any1                     | 4.37 (1.40-13.71)   |
| occupation | oad_any1                     | 1.12 (0.52-2.42)    |
| occupation | job_family_grpallied heal    | 2.03 (0.62-6.63)    |
| occupation | job_family_grpadministrat    | 2.54 (0.57-11.34)   |
| occupation | job_family_grpOther          | 2.92 (0.84-10.11)   |
| occupation | job_family_grpnursing<br>and | 3.39 (1.23-9.32)    |
| occupation | job_family_grpsupport ser    | 5.00 (1.47-17.04)   |
| pt         | ps(age10)3                   | 0.96 (0.34-2.72)    |
| pt         | ps(age10)4                   | 1.00 (0.14-7.14)    |
| pt         | ps(age10)5                   | 1.37 (0.11-16.29)   |
| pt         | ps(age10)6                   | 2.67 (0.20-36.31)   |
| pt         | ps(age10)7                   | 6.97 (0.54-90.07)   |
| pt         | ps(age10)8                   | 15.30 (1.27-184.98) |
| pt         | ps(age10)9                   | 18.66 (1.56-223.73) |
| pt         | ps(age10)10                  | 14.65 (1.20-178.20) |
| pt         | ps(age10)11                  | 15.67 (1.25-195.84) |
| pt         | ps(age10)12                  | 22.47 (1.61-313.17) |
| pt         | ps(age10)13                  | 31.39 (1.86-530.86) |
| pt         | ps(age10)14                  | 43.29 (1.96-958.58) |
| pt         | male                         | 2.02 (1.33-3.07)    |
| pt         | rolepf_any                   | 1.60 (0.53-4.76)    |
| pt         | roleundetermined             | 1.19 (0.39-3.66)    |
| pt         | white                        | 0.74 (0.33-1.69)    |
| pt         | simd                         | 1.03 (0.91-1.17)    |
| pt         | como_count                   | 1.59 (1.26-2.01)    |
| pt         | heart_other_any1             | 0.60 (0.30-1.20)    |
| pt         | t2dm                         | 1.96 (1.18-3.28)    |
| pt         | unkdm                        | 4.79 (1.45-15.85)   |



|    |                              |                   |
|----|------------------------------|-------------------|
| pt | ckd_any1                     | 4.44 (1.40-14.04) |
| pt | oad_any1                     | 1.12 (0.51-2.43)  |
| pt | job_family_grpallied heal    | 1.87 (0.50-6.98)  |
| pt | job_family_grpadministrat    | 2.31 (0.48-11.07) |
| pt | job_family_grpOther          | 2.48 (0.65-9.48)  |
| pt | job_family_grpnursing<br>and | 3.11 (0.97-9.96)  |
| pt | job_family_grpsupport ser    | 4.75 (1.27-17.76) |
| pt | part_timep                   | 0.70 (0.49-1.01)  |
| pt | part_timegeneral practice    | 0.55 (0.06-5.39)  |

***Conditional logistic regression models***

| Model      | Parameters     | Estimate and 95% Confidence Interval |
|------------|----------------|--------------------------------------|
| agesex     | rolepopulation | 0.87 (0.50-1.49)                     |
| ethnicsimd | rolepopulation | 0.83 (0.48-1.43)                     |
| ethnicsimd | white          | 1.49 (0.88-2.54)                     |
| ethnicsimd | simd           | 0.87 (0.84-0.91)                     |
| como       | rolepopulation | 0.86 (0.49-1.51)                     |
| como       | white          | 1.74 (1.02-2.98)                     |
| como       | simd           | 0.92 (0.88-0.96)                     |
| como       | como_count     | 1.76 (1.68-1.84)                     |
| wa         | hhold_wa       | 2.23 (1.78-2.79)                     |
| modkids    | rolepopulation | 0.10 (0.01-1.60)                     |
| modolder   | rolepopulation | 1.99 (0.62-6.41)                     |

Supplementary figure A

Overview of linkage and analysis for examining risk of COVID-19 among Healthcare workers

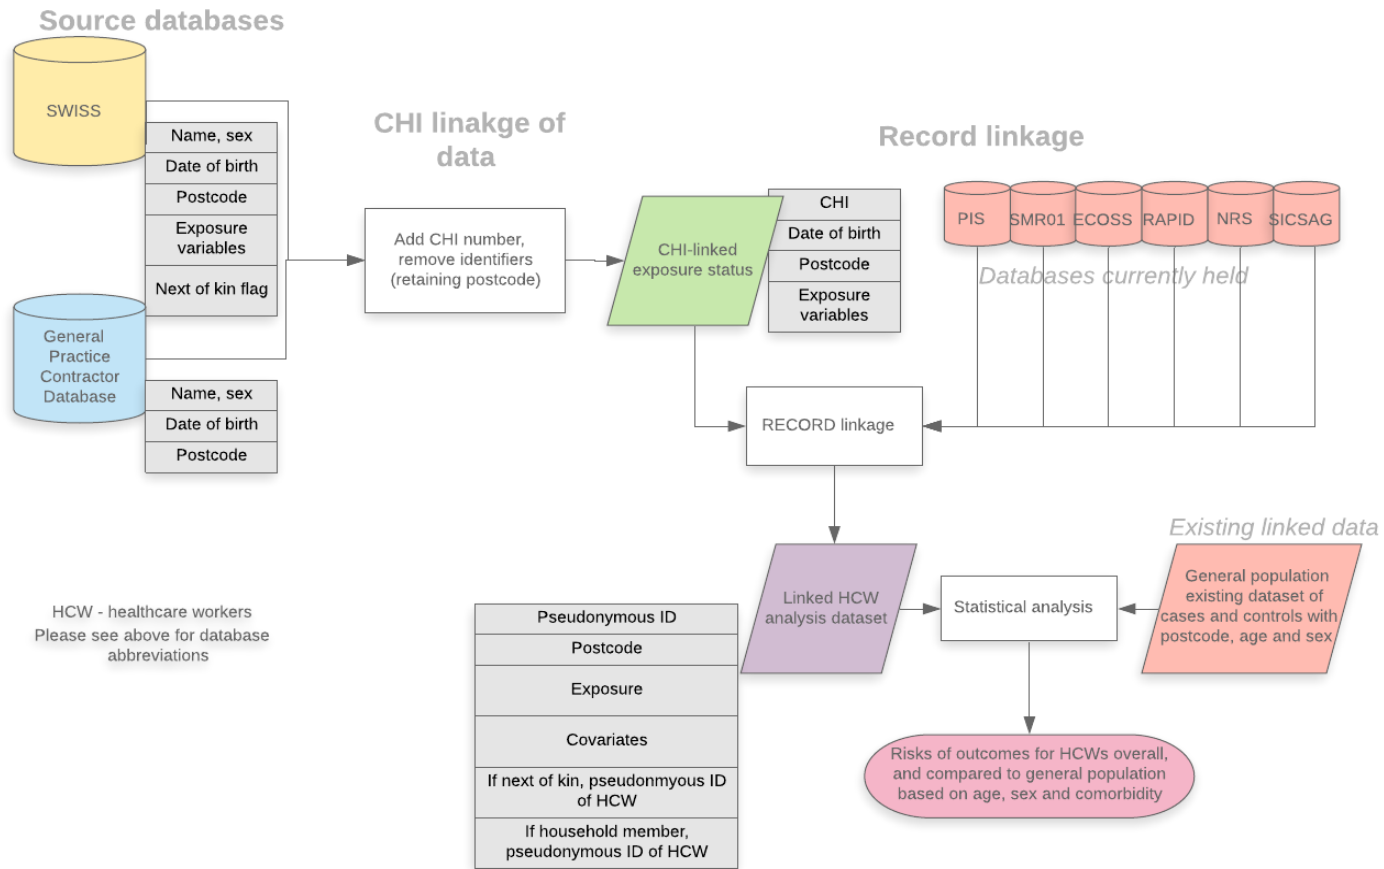

## Supplementary figure B

|                                   | Other Scottish population                                    | Healthcare worker data                                               | Household members                                                   |
|-----------------------------------|--------------------------------------------------------------|----------------------------------------------------------------------|---------------------------------------------------------------------|
| Non cases                         | Non-sampled Scottish population (n = 5,009,368)              | Healthcare worker population (aged 18-65 years) (n=158,202)          | Household member population (all ages) (n=229,764)                  |
|                                   | Randomly sampled* (n=59,620)                                 |                                                                      |                                                                     |
| Cases (COVID-19) hospitalisations | All cases of COVID-19 hospitalization in Scotland* (n=5,962) | All cases of COVID-19 hospitalization in healthcare workers* (n=243) | All cases of COVID-19 hospitalization in household members* (n=141) |
|                                   | <b>Total</b>                                                 | n=5,074,950                                                          | n=158,445                                                           |

### Explanatory notes

- Age, sex and Scottish index of multiple deprivation, and outcome data was available for all Scottish residents. Additional covariate information was available for those Scottish residents indicated in the green boxes.
- The total Scottish population, based on 2019 mid-year estimates was 5,463,300.
- The total number of cases in the Scottish population was 6,346
- \*this population forms part of the REACT-COVID-19 nested case control study. As such clinical information was available on **all** COVID-19 hospitalizations in Scotland including those in healthcare workers and their households as well as a random sample of controls.
