# Supplementary material for: Risk of hospital admission with coronavirus disease 2019 in healthcare workers and their households: nationwide linkage cohort study
Source: PubMed Central journal article supplement (PMC7591828; doi:10.1136/bmj.m3582), 2020-10-28
Supplement: shaa060836.ww2.pdf [file shaa060836.ww2.pdf]

# Dynamic statistical analysis plan for study of the risk of COVID-19 in NHS Staff

## Background

By the nature of their work, many healthcare workers (HCWs) have greater exposure to SARS-CoV2 than the general population. To inform HCWs and make optimal decisions about minimising risk, we need to know whether and how this increased exposure translates to an increased risk of COVID19-related (i) hospitalisation, (ii) mechanical ventilation and other forms of intensive care and (iii) death. We need to know both the overall risk, and the risk according to the HCWs role (since HCW is usually defined to include individuals in supporting roles within healthcare organisations as well as those providing direct care) as well as their age, sex and the presence/absence of any underlying long-term conditions.

To guide the monitoring of HCWs as part of the wider COVID19 prevention strategy it is also important for health services to know rates of testing as well as rates of testing positive among different types of HCWs working in different settings. Finally, to inform infection transmission models, it is also necessary to estimate how much transmission is occurring through HCWs.

Within Scotland, it is possible to produce these estimates for many HCWs because there exists a national database used to help manage the NHS workforce, the Scottish Workforce Information Standard System (SWISS). SWISS includes details of each staff member's role, grade, occupation, service area and working location, alongside their name, date of birth and postcode. SWISS covers all directly employed NHS staff, around 150,000 individuals. In addition, Public Health Scotland holds the General Practice Contractor Database (GPCD) which, includes the name, date of birth, sex and postcode of all general practice (GP) partners as well as salaried GPs. Therefore, Scotland has comprehensive data on NHS staff. The SWISS and GPCD database can be linked to healthcare records held within Public Health Scotland in order to address the following aims and objectives.

## Aims and objectives

### Aims

- 1 To estimate the risk of COVID19 among HCWs and members of their households.
- 2 To estimate rates of SARS-CoV2 testing among HCWs
- 3 To produce summary statistics on transmission among HCWs

### Objectives

- 1.1 To estimate the risk of hospitalisation for COVID19 among HCWs
- 1.2 To estimate the risk of intensive care unit admission for COVID19 among HCWs
- 1.3 To estimate 1.2 and 1.3 according to role (see below), professional grouping (eg medical, nursing, AHP etc), seniority grade, age, sex and common underlying conditions
- 1.4 To estimate 1.1-1.3 for household members of HCWs
- 2.1 To estimate rates of any testing and testing positive among HCWs across role, occupation, grade, age, sex and common underlying conditions

3.1 To produce summary statistics on the number of infections among next of kin and household members of HCWs.

## Methods

### Timeframe/cohort entry

Any HCW recorded as being a “current” member of staff not on maternity leave (or similar) on the SWISS/GPCD databases on or after 1<sup>st</sup> March 2020 to date.

We will analyse separately those staff working solely in child health. For the purpose of excluding this group from the set of NHS staff working with adults, we defined a child health HCW as one who (i) is in a paediatric medical specialty (child and adolescent psychiatry, community child health, paediatric and perinatal pathology, paediatric cardiology, paediatric dentistry, paediatric surgery, paediatrics) or subspecialty (neonatal medicine), a child-focussed Agenda for Change (AFC) job family (Appendix 1), and/or (ii) is identified as working exclusively with people aged 18 or younger. For estimating the risk of COVID19 in child health healthcare workers, we will use a narrower definition restricted to criteria (i).

We will also analyse staff working in dentistry separately. We will do so for two reasons. First, there have been large changes in dental practice as a result of the pandemic with only emergency dental care taking place and secondly it is difficult to identify different specialties within dentistry using the SWISS database. Finally, we will also examine GPs separately (there are no data on staff members directly employed by practices other than GPs), since this group primarily work in the community rather than in hospital.

### Basis of definitions

The following definitions (roles, occupations and grades) were refined after producing summary statistics of the numbers in each group, but BEFORE linking the SWISS database (the GPCD database had already been linked) to the databases containing the outcome data.

For the purposes of this analysis, likely roles have been defined narrowly. We aimed to identify those staff who, despite re-deployment as part of the COVID-19 response, are most likely to be in these roles. **This means that many staff who are patient-facing, and who even see patients with suspected COVID19 in “front-door” settings, may not be so classified.** For example, doctors in the “Clinical Pharmacology & Therapeutics” specialty frequently provide a general internal medicine service. However, where these doctors do not have “General (Internal) Medicine” (or similar) listed among their specialties they will *not* be classified as “Patient facing, front-door COVID”. We did so to avoid non-differential misclassification bias, which would lead us to under-estimate risk in these exposure groups. Nonetheless, these risks once estimated may be applied to members of staff fulfilling functions typically associated with these roles, regardless of their official job title, based on local knowledge.

### Roles

Mutually exclusive and exhaustive roles were defined for all staff. Broad roles were “Undetermined”, “Non-patient facing” and “Patient facing” (Table 2a). Within “Patient facing” the following narrower roles were defined – “front-door COVID”, “Resp-oral-nasal-aerosol generating procedure prone role (AGP)”, “Intensive care” and “Patient facing, other” (Table 2b).

Staff of a seniority grade which implied that they were most likely to work in predominantly managerial/administrative areas were defined as non-patient facing. Staff who are senior managers

will therefore not be defined as “patient facing” regardless of their specialty or AFC job family. Nursing and midwifery staff who are band 8a were also assigned to “undetermined” with those in 8b-8d assigned non-patient-facing. Staff based exclusively in selected non-territorial Health Boards (Healthcare Improvement Scotland, NHS 24, NHS National Services Scotland (NEED TO CHECK IF STAFF PROVIDING SPECIALIST CLINICAL SERVICES – EG THE ADULT CYSTIC FIBROSIS SERVICE, ARE LISTED AS NSS STAFF - <https://www.nss.nhs.scot/browse/specialist-healthcare/specialist-services>) and NHS Education for Scotland) were also designated as non-patient facing. Other than this, roles were defined on the basis of specialties for medical and dental staff and AFC job families for other staff. For some staff information on their service area was also included (Tables 1a and 1b).

Table 1a Broad role

| Definition          | Description                                                                                              | Definition                                                                      | Comparator(s)      |
|---------------------|----------------------------------------------------------------------------------------------------------|---------------------------------------------------------------------------------|--------------------|
| Any staff           | Any member of NHS staff.                                                                                 | Included in SWISS or GPCD database                                              | General population |
| Patient facing, any | Include if likely to currently be working in patient-facing role.                                        | Specific list of AFC roles and/or medical specialties (see Appendix 1)          | General population |
| Non-patient-facing  | Any member of NHS staff likely to be in a non-patient-facing role.                                       | Specific list of AFC roles and/or medical specialties (see Appendix 1)          | General population |
| Undetermined        | Staff where it is not possible to allocate with confidence to patient-facing or non-patient-facing roles | Any staff not in “Patient-facing, any” or “Non-patient-facing” (see Appendix 1) | General population |

Table 1b Narrow role (all are defined within patient-facing)

| Definition                          | Description                                                                                                                                                                     | Definition*                                                                                            | Comparator(s)         |
|-------------------------------------|---------------------------------------------------------------------------------------------------------------------------------------------------------------------------------|--------------------------------------------------------------------------------------------------------|-----------------------|
| Patient-facing, front-door COVID19  | Include if involved in acute medical receiving of patients with possible or probable COVID19 (ie not incidental finding such as COVID19 in patient with myocardial infarction). | Specific list of AFC roles and/or medical specialties and/or designated service area (see Appendix 1). | Patient-facing, other |
| Patient-facing, Resp-oral-nasal-AGP | Include if involved in work with high risk of exposure to oral, nasal or respiratory secretions and/or aerosol generating procedures (AGP).                                     | Specific list of AFC roles and/or medical specialties and/or designated service area (see Appendix 1). | Patient-facing, other |
| Patient-facing, Intensive care      | Intensive care medicine and anaesthetic specialties                                                                                                                             | Specific list of AFC roles and/or medical specialties and/or designated service area (see Appendix 1). | Patient-facing, other |
| Patient-facing, other               | Patient-facing role but not front-door COVID or resp-oral-nasal-AGP or intensive care.                                                                                          | Patient-facing role but not front-door COVID or resp-oral-nasal-AGP or intensive care.                 |                       |

\*Nursing staff in the General Acute Nursing, Specialist Nursing and Bank Nursing AFC sub-job families, have been further assigned to specific roles according to the recorded service area (Appendix 1). This was done for the following territorial Health Boards, in whom there is >= 95% completeness for the service area variable: - NHS Ayrshire & Arran, NHS Borders, NHS Dumfries & Galloway, NHS Forth Valley, NHS Grampian, NHS Greater Glasgow & Clyde, NHS Highland, NHS Orkney and NHS Shetland. The remaining territorial boards had lower completeness for service area (ranging from 91% to <1%)

### Covariates

In addition to age and sex, the covariates shown in Table 3 were defined.

Table 2 Covariates

| Name                         | Definition                                                                                                                                                                                                                                                                                                                                                        |
|------------------------------|-------------------------------------------------------------------------------------------------------------------------------------------------------------------------------------------------------------------------------------------------------------------------------------------------------------------------------------------------------------------|
| SWISS only                   |                                                                                                                                                                                                                                                                                                                                                                   |
| Immigration status           | Staff having any immigration status (ie being a non-national) recorded on SWISS yes/no.                                                                                                                                                                                                                                                                           |
| Any long-term illness        | Defined using self-described "Longstanding illness"                                                                                                                                                                                                                                                                                                               |
| Length of service            | Length of service in years                                                                                                                                                                                                                                                                                                                                        |
| Household composition        | Number of individuals in household                                                                                                                                                                                                                                                                                                                                |
| SWISS and general population |                                                                                                                                                                                                                                                                                                                                                                   |
| Chronic diseases             | Pre-specified definitions based on SMR01 and pseudo-BNF codes. These are ischaemic heart disease, other heart disease, other circulatory disease, chronic kidney disease, chronic lower respiratory disease, neurological disorders, liver disease, immunodeficiency and immunosuppression, neoplasm, disorders of oesophagus, stomach and duodenum (see Appendix |

|                                        |                                                                                             |
|----------------------------------------|---------------------------------------------------------------------------------------------|
|                                        | for definitions).                                                                           |
| Ethnicity                              | ONOMAP-derived ethnicity ( <a href="https://www.onomap.org/">https://www.onomap.org/</a> ). |
| Scottish index of multiple deprivation | Area based measure of socio-economic deprivation                                            |

Note that ethnicity is also recorded in the SWISS database ([https://www.isdscotland.org/Health-Topics/Workforce/NES-Publication/Equality and Diversity S2019.xlsx](https://www.isdscotland.org/Health-Topics/Workforce/NES-Publication/Equality%20and%20Diversity%202019.xlsx)) but this is not yet available in data available to PHS hence we will use general population definitions. Moreover, even when available there are high levels of missingness for ethnicity, with around 19.4% responding “not known” and 12% declining to answer.

We will also define each staff member’s grade. For medical and dental job family we collapsed the grade and medical grade variables into three broad categories; consultant, specialty and associate specialist and “training” grades. The latter category contains a broad range of roles. For the remaining job families, staff were grouped into grades 1-4, grades 5-7, and grade 8 or above.

Based on AFC job family, staff will also be allocated into broadly defined occupations, which are shown in Table 3.

Table 3 Occupations

| Agenda for Change Job Family                                                                                                                                                     | Number of staff members |
|----------------------------------------------------------------------------------------------------------------------------------------------------------------------------------|-------------------------|
| Nursing and Midwifery                                                                                                                                                            | 69499                   |
| Administrative Services                                                                                                                                                          | 29522                   |
| Support Services                                                                                                                                                                 | 17708                   |
| Medical and Dental                                                                                                                                                               | 15342                   |
| Allied Health Profession                                                                                                                                                         | 14251                   |
| Other (includes Ambulance Services, Dental Support, Healthcare Sciences, Medical Support, Other Therapeutic, Personal And Social Care, Senior Managers, Unallocated / Not Known) | 20625                   |
| General practice – GP partners and salaried GPs <i>only</i>                                                                                                                      | 5400                    |

## Outcomes

We will use selected outcome definitions from the COVID19 case-control study (REACT) (Table 4). Of these, “B Test positive and hospitalised” is the primary outcome for this analysis.

Table 4 also shows the event counts for these outcomes as of the 15<sup>th</sup> of May 2020, for the whole of Scottish population including the working age (25 to 64 years) and non-working age population.

Table 4 Selected COVID-19 outcomes for the entire Scottish population, as well as counts of these events, for the working age and non-working age populations

| Outcome                          | Working age | Non-working age |
|----------------------------------|-------------|-----------------|
| A Test positive for SARS-COV2    | 7395        | 7669            |
| B Test positive and hospitalised | 1864        | 3433            |
| C Test positive and ICU          | 389         | 235             |
| D Test positive, no ICU and died | 389         | 235             |

|                                                  |         |         |
|--------------------------------------------------|---------|---------|
| E Test positive and ICU or died                  | 591     | 3201    |
| F Test negative or no test, COVID19 on NRS death | 106     | 1180    |
| Population denominator                           | 3000000 | 2500000 |

## Statistical analysis

### Sample sizes and event numbers

On applying the population-wide working age rates to the SWISS/GPCD samples, assuming the rates are the same in HCWs as in the general population, the expected counts shown in Table 5 are obtained.

Table 5 Rate per 1000 for working age population and expected counts for each professional grouping

| Outcome                                          | Rate per 1000 | Nursing and Midwifery | Administrative Services | Support Services | Medical and Dental | Allied Health Profession | Other groups | GP          | Total         |
|--------------------------------------------------|---------------|-----------------------|-------------------------|------------------|--------------------|--------------------------|--------------|-------------|---------------|
| A Test positive                                  | 2.46          | 170.97                | 72.62                   | 43.56            | 37.74              | 35.06                    | 50.74        | 12.4        | 425.55        |
| <b>B Test positive and hospitalised</b>          | <b>0.62</b>   | <b>43.09</b>          | <b>18.3</b>             | <b>10.98</b>     | <b>9.51</b>        | <b>8.84</b>              | <b>12.79</b> | <b>3.13</b> | <b>107.26</b> |
| C Test positive and ICU                          | 0.13          | 9.03                  | 3.84                    | 2.3              | 1.99               | 1.85                     | 2.68         | 0.66        | 22.48         |
| D Test positive, no ICU and died                 | 0.13          | 9.03                  | 3.84                    | 2.3              | 1.99               | 1.85                     | 2.68         | 0.66        | 22.48         |
| E Test positive and ICU or died                  | 0.2           | 13.9                  | 5.9                     | 3.54             | 3.07               | 2.85                     | 4.13         | 1.01        | 34.6          |
| F Test negative or no test, COVID19 on NRS death | 0.04          | 1.18                  | 0.57                    | 0.202            | 0.614              | 2.78                     | 0.825        | 0.708       | 6.92          |

We will present baseline characteristics as well as counts of events (and rates) for staff who had any test, as well as for the above outcomes. We will present counts and rates for COVID-19 hospitalisation, intensive care unit admission and death for staff members themselves, as well as for their households. We will present these summary statistics according to the broad (Table 2a), and narrow roles (Table 2b), occupations (Table 3) and seniority grades.

### Comparison of HCWs with general population

We will compare rates in each of the broad role definitions – “patient facing”, “non-patient facing” and “undetermined” (Table 2a) to the general population via linkage to the existing case-control REACT study. We will estimate rate ratios using conditional logistic regression models which allow

for the matching on age, sex and general practice area used in the case-control design. In further models we will additionally adjust for the covariates listed in Table 2.

### Comparison within HCWs

Within the HCW cohort, we will compare rates across the narrow role definitions – “front-door COVID”, “Resp-oral-nasal-AGP”, “Intensive care” and “Patient facing, other” (Table 2b) using Cox regression models. We will fit the model using calendar time, treating 1<sup>st</sup> March 2020 as day 1. We will stratify into four groups of Health Boards:- Greater Glasgow and Clyde; Lanarkshire; Ayrshire and Arran, Borders, Dumfries and Galloway, Fife, Forth Valley, Lothian, and Tayside; Grampian, Highland, Orkney, Shetland, Western Isles. The groups were chosen because on plotting the cumulative incidence of COVID-19 hospitalisation over time for the whole Scottish population, these boards were similar. The groups also make sense in terms of the geography of Scotland. We will initially adjust for age and sex, and will subsequently add terms for the covariates listed in Table 3. Finally, we will include terms for occupation (Table 3) and grade. As occupation and grade are of interest per se (not just as potential confounders) we will present hazard ratios for the effect of each of these in combination (by additional relevant coefficients on the linear predictor scale). We will test for interactions between specific exposure groups, although such tests are expected to lack statistical power in view of the comparatively small numbers of events expected (Table 5). Some households include more than one member of staff. To accommodate this, we will specify household as a clustering variable within the `survival::coxph` function, which allows for correlation in the calculation of valid standard errors in the presence of clustering.

### Household members

We will repeat the modelling described above, but with hospitalisation for COVID-19 in a household member as the outcome variable. We will restrict the household member analysis to households with 6 or fewer individuals to avoid including staff residing in institutions.

### Presenting risk for HCWs

Using outputs from the above models (and the baseline hazards), we will present estimates of the risk of COVID-19 hospitalisation at the censoring date, alongside 95% confidence intervals. These risks will be presented according to age, sex, role, comorbidity and any other influential variables identified in the modelling.

### Review

Within the PHS network, much of the R code for the preceding analyses as well as some summary statistics and tables can be viewed here ([https://phs-git.nhsnss.scot.nhs.uk/COVID-19/health\\_care\\_workers](https://phs-git.nhsnss.scot.nhs.uk/COVID-19/health_care_workers)).

## Appendix 1 List of specialties/job roles/service areas

### Medical specialties

|                                          | Non patient-facing | Patient-facing |            |                     |                |
|------------------------------------------|--------------------|----------------|------------|---------------------|----------------|
|                                          |                    | Any            | Front-door | Resp-oral-nasal-AGP | Intensive care |
| Acute Internal Medicine                  |                    | Yes            | Yes        |                     |                |
| Allergy                                  |                    |                |            |                     |                |
| Anaesthetics                             |                    | Yes            |            |                     | Yes            |
| Audio Vestibular Medicine                |                    |                |            |                     |                |
| Audiological Medicine                    |                    |                |            |                     |                |
| Blood Transfusion                        |                    |                |            |                     |                |
| Breast Screening Service                 |                    |                |            |                     |                |
| Cardiology                               |                    | Yes            |            |                     |                |
| Cardiothoracic Surgery                   |                    | Yes            |            |                     |                |
| Chemical Pathology                       |                    |                |            |                     |                |
| Child And Adolescent Psychiatry          |                    |                |            |                     |                |
| Clinical Genetics                        |                    |                |            |                     |                |
| Clinical Neurophysiology                 |                    |                |            |                     |                |
| Clinical Oncology                        |                    | Yes            |            |                     |                |
| Clinical Pharmacology and Therapeutics   |                    | Yes            |            |                     |                |
| Clinical Radiology                       |                    |                |            |                     |                |
| Community Child Health                   |                    |                |            |                     |                |
| Community Dentistry                      |                    | Yes            |            | Yes                 |                |
| Community Psychiatry                     |                    | Yes            |            |                     |                |
| Community Sexual And Reproductive Health |                    | Yes            |            |                     |                |
| Dental & Maxillofacial Radiology         |                    |                |            |                     |                |
| Dental Public Health                     |                    |                |            |                     |                |
| Dermatology                              |                    |                |            |                     |                |
| Diagnostic Neuropathology                | Yes                |                |            |                     |                |
| Emergency Medicine                       |                    | Yes            | Yes        |                     |                |
| Endocrinology and Diabetes               |                    | Yes            |            |                     |                |
| Endodontics                              |                    | Yes            |            | Yes                 |                |
| Ent Surgery                              |                    | Yes            |            | Yes                 |                |
| Family Planning Service                  |                    |                |            |                     |                |
| Fixed & Removable Prosthodontics         |                    |                |            |                     |                |
| Forensic Histopathology                  | Yes                |                |            |                     |                |
| Forensic Psychiatry                      |                    |                |            |                     |                |
| Gastroenterology                         |                    | Yes            |            |                     |                |

|                                    |     |     |     |     |     |
|------------------------------------|-----|-----|-----|-----|-----|
| General (Internal) Medicine        |     | Yes | Yes |     |     |
| General Psychiatry                 |     | Yes |     |     |     |
| General Surgery                    |     | Yes |     |     |     |
| Genito-Urinary Medicine            |     | Yes |     |     |     |
| Geriatric Medicine                 |     | Yes | Yes |     |     |
| GP Other Than Obstetrics           |     | Yes |     |     |     |
| Haematology                        |     |     |     |     |     |
| Histopathology                     | Yes |     |     |     |     |
| Homeopathy                         |     |     |     |     |     |
| Immunology                         |     |     |     |     |     |
| Infectious Diseases                |     | Yes | Yes |     |     |
| Intensive Care Medicine            |     | Yes |     |     | Yes |
| Medical Microbiology And Virology  |     |     |     |     |     |
| Medical Oncology                   |     | Yes |     |     |     |
| Medical Ophthalmology              |     | Yes |     |     |     |
| Microbiology                       |     |     |     |     |     |
| Neurology                          |     | Yes |     |     |     |
| Neurosurgery                       |     | Yes |     |     |     |
| Nuclear Medicine                   |     |     |     |     |     |
| Obstetrics And Gynaecology         |     | Yes |     |     |     |
| Occupational Medicine              |     | Yes |     |     |     |
| Old Age Psychiatry                 |     | Yes |     |     |     |
| Ophthalmology                      |     | Yes |     |     |     |
| Oral And Maxillofacial Surgery     |     | Yes |     | Yes |     |
| Oral And Maxillofacial Pathology   | Yes |     |     |     |     |
| Oral Medicine                      |     | Yes |     | Yes |     |
| Oral Microbiology                  |     |     |     |     |     |
| Oral Pathology                     |     |     |     |     |     |
| Oral Surgery                       |     | Yes |     | Yes |     |
| Orthodontics                       |     | Yes |     | Yes |     |
| Otolaryngology                     |     | Yes |     | Yes |     |
| Paediatric And Perinatal Pathology | Yes |     |     |     |     |
| Paediatric Cardiology              |     | Yes |     |     |     |
| Paediatric Dentistry               |     | Yes |     | Yes |     |
| Paediatric Surgery                 |     | Yes |     |     |     |
| Paediatrics                        |     | Yes | Yes |     |     |
| Pain Management                    |     |     |     |     |     |
| Palliative Medicine                |     |     |     |     |     |
| Plastic Surgery                    |     | Yes |     |     |     |
| Psychiatry Of Learning Disability  |     |     |     |     |     |
| Psychotherapy                      |     |     |     |     |     |
| Public Health Medicine             | Yes |     |     |     |     |
| Rehabilitation Medicine            |     | Yes |     |     |     |
| Renal Medicine                     |     | Yes |     |     |     |

|                                |  |     |  |     |  |
|--------------------------------|--|-----|--|-----|--|
| Respiratory Medicine           |  | Yes |  | Yes |  |
| Restorative Dentistry          |  |     |  |     |  |
| Rheumatology                   |  | Yes |  |     |  |
| Special Care Dentistry         |  | Yes |  | Yes |  |
| Surgical Dentistry             |  | Yes |  | Yes |  |
| Trauma And Orthopaedic Surgery |  | Yes |  |     |  |
| Urology                        |  | Yes |  |     |  |
| Vascular Surgery               |  | Yes |  |     |  |
| Virology                       |  |     |  |     |  |

There are two specialty fields in the SWISS database. These are “specialty” with around 85% completeness, and “second specialty” with lower completeness. We added data from TURAS People (which holds data on doctors in training roles) to increase the completeness to approximately 98%.

## Agenda for change job families

| Job Family               | Job Sub Family                 | Non patient-facing | Patient facing |            |                     |            |
|--------------------------|--------------------------------|--------------------|----------------|------------|---------------------|------------|
|                          |                                |                    | Any            | Front-door | Resp-oral-nasal-AGP | Job Family |
| ADMINISTRATIVE SERVICES  | FINANCE                        | Yes                |                |            |                     |            |
| ADMINISTRATIVE SERVICES  | HUMAN RESOURCES                | Yes                |                |            |                     |            |
| ADMINISTRATIVE SERVICES  | INFORMATION SYSTEMS/TECHNOLOGY | Yes                |                |            |                     |            |
| ADMINISTRATIVE SERVICES  | NA                             | Yes                |                |            |                     |            |
| ADMINISTRATIVE SERVICES  | NHS24 CALL HANDLER             | Yes                |                |            |                     |            |
| ADMINISTRATIVE SERVICES  | OFFICE SERVICES                | Yes                |                |            |                     |            |
| ADMINISTRATIVE SERVICES  | PATIENT SERVICES               | Yes                |                |            |                     |            |
| ALLIED HEALTH PROFESSION | AHP TRAINING/ADMINISTRATION    | Yes                |                |            |                     |            |
| ALLIED HEALTH PROFESSION | AMBULANCE PARAMEDIC            |                    | Yes            | Yes        |                     |            |
| ALLIED HEALTH PROFESSION | ARTS THERAPIES                 |                    |                |            |                     |            |
| ALLIED HEALTH PROFESSION | DIAGNOSTIC RADIOGRAPHY         |                    | Yes            |            |                     |            |
| ALLIED HEALTH PROFESSION | DIETETICS                      |                    |                |            |                     |            |
| ALLIED HEALTH PROFESSION | GENERIC THERAPIES              |                    |                |            |                     |            |
| ALLIED HEALTH PROFESSION | OCCUPATIONAL THERAPY           |                    | Yes            |            |                     |            |
| ALLIED HEALTH PROFESSION | ORTHOPTICS                     |                    |                |            |                     |            |
| ALLIED HEALTH PROFESSION | ORTHOTICS                      |                    | Yes            |            |                     |            |
| ALLIED HEALTH PROFESSION | PHYSIOTHERAPY                  |                    | Yes            |            | Yes                 |            |
| ALLIED HEALTH PROFESSION | PODIATRY                       |                    | Yes            |            |                     |            |
| ALLIED HEALTH PROFESSION | PROSTHETICS                    |                    |                |            |                     |            |
| ALLIED HEALTH PROFESSION | SPEECH AND LANGUAGE THERAPY    |                    | Yes            |            |                     |            |
| ALLIED HEALTH PROFESSION | THERAPEUTIC RADIOGRAPHY        |                    | Yes            | Yes        |                     |            |

|                     |                                |     |     |     |     |  |
|---------------------|--------------------------------|-----|-----|-----|-----|--|
| AMBULANCE SERVICES  | AMBULANCE CARE ASSISTANT       |     | Yes | Yes |     |  |
| AMBULANCE SERVICES  | AMBULANCE TECHNICIAN           |     | Yes | Yes |     |  |
| AMBULANCE SERVICES  | DRIVER                         |     | Yes | Yes |     |  |
| AMBULANCE SERVICES  | EMDC OPERATIVE                 | Yes |     |     |     |  |
| AMBULANCE SERVICES  | OPERATIONAL MANAGER            | Yes |     |     |     |  |
| AMBULANCE SERVICES  | PTS DAY CONTROL                | Yes |     |     |     |  |
| DENTAL SUPPORT      | CLINICAL DENTAL TECHNICIAN     |     | Yes |     | Yes |  |
| DENTAL SUPPORT      | DENTAL HYGIENIST               |     | Yes |     | Yes |  |
| DENTAL SUPPORT      | DENTAL HYGIENIST-THERAPIST     |     | Yes |     | Yes |  |
| DENTAL SUPPORT      | DENTAL NURSING                 |     | Yes |     | Yes |  |
| DENTAL SUPPORT      | DENTAL TECHNICIAN              |     | Yes |     | Yes |  |
| DENTAL SUPPORT      | DENTAL THERAPIST               |     | Yes |     | Yes |  |
| DENTAL SUPPORT      | ORAL HEALTH                    |     |     |     |     |  |
| DENTAL SUPPORT      | ORTHODONTIC THERAPIST          |     | Yes |     | Yes |  |
| EMERGENCY SERVICES  | AMBULANCE AUXILIARY            |     | Yes | Yes |     |  |
| EMERGENCY SERVICES  | AMBULANCE CARE ASSISTANT       |     | Yes | Yes |     |  |
| EMERGENCY SERVICES  | AMBULANCE PARAMEDIC            |     | Yes | Yes |     |  |
| EMERGENCY SERVICES  | AMBULANCE TECHNICIAN           |     | Yes | Yes |     |  |
| EMERGENCY SERVICES  | DRIVER                         |     | Yes | Yes |     |  |
| EMERGENCY SERVICES  | EMDC OPERATIVE                 | Yes |     |     |     |  |
| EMERGENCY SERVICES  | OPERATIONAL MANAGER            | Yes |     |     |     |  |
| EMERGENCY SERVICES  | PTS DAY CONTROL                |     |     |     |     |  |
| HEALTHCARE SCIENCES | BIOMEDICAL SCIENCES LIFE       |     |     |     |     |  |
| HEALTHCARE SCIENCES | CLIN PHOTO/ILLUSTRATE PHYSICAL |     |     |     |     |  |
| HEALTHCARE SCIENCES | CLINICAL PERFUSION PHYSIOLOGY  |     |     |     |     |  |
| HEALTHCARE SCIENCES | CLINICAL PHYSIOLOGY            |     |     |     |     |  |
| HEALTHCARE SCIENCES | CLINICAL SCIENCES LIFE         |     |     |     |     |  |
| HEALTHCARE SCIENCES | CLINICAL SCIENCES PHYSICAL     |     |     |     |     |  |

|                            |                                   |     |     |     |     |  |
|----------------------------|-----------------------------------|-----|-----|-----|-----|--|
| HEALTHCARE SCIENCES        | CLINICAL SCIENCES<br>PHYSIOLOGY   |     |     |     |     |  |
| HEALTHCARE SCIENCES        | CLINICAL TECHNOLOGY LIFE          |     |     |     |     |  |
| HEALTHCARE SCIENCES        | CLINICAL TECHNOLOGY<br>PHYSICAL   |     |     |     |     |  |
| HEALTHCARE SCIENCES        | MAXILLOFACIAL PROS<br>PHYSICAL    |     |     |     |     |  |
| HEALTHCARE SCIENCES        | NA                                |     |     |     |     |  |
| HEALTHCARE SCIENCES        | STERILE SERVICES LIFE             |     |     |     |     |  |
| MEDICAL AND DENTAL SUPPORT | DENTAL NURSING                    |     | Yes |     | Yes |  |
| MEDICAL AND DENTAL SUPPORT | DENTAL TECHNOLOGY                 |     | Yes |     | Yes |  |
| MEDICAL AND DENTAL SUPPORT | OPERATING DEPARTMENT              |     | Yes |     |     |  |
| MEDICAL AND DENTAL SUPPORT | ORAL HEALTH                       |     | Yes |     | Yes |  |
| MEDICAL AND DENTAL SUPPORT | PHYSICIANS ASSISTANT              |     |     |     |     |  |
| MEDICAL AND DENTAL SUPPORT | THEATRE SERVICES                  |     | Yes |     |     |  |
| MEDICAL SUPPORT            | OPERATING DEPARTMENT              |     | Yes |     |     |  |
| MEDICAL SUPPORT            | PHYSICIANS ASSISTANT              |     | Yes |     |     |  |
| MEDICAL SUPPORT            | THEATRE SERVICES                  |     | Yes |     |     |  |
| NURSING AND MIDWIFERY      | COMMUNITY CHILDREN'S<br>NURSING   |     |     |     |     |  |
| NURSING AND MIDWIFERY      | MIDWIFERY DIRECT CC               |     | Yes |     |     |  |
| NURSING AND MIDWIFERY      | MIDWIFERY INDIRECT CC             |     | Yes |     |     |  |
| NURSING AND MIDWIFERY      | NA                                |     |     |     |     |  |
| NURSING AND MIDWIFERY      | NEONATAL MIDWIFERY CC             |     | Yes |     |     |  |
| NURSING AND MIDWIFERY      | NEONATAL MIDWIFERY<br>DIRECT CC   |     | Yes |     |     |  |
| NURSING AND MIDWIFERY      | NEONATAL MIDWIFERY<br>INDIRECT CC |     | Yes |     |     |  |
| NURSING AND MIDWIFERY      | NEONATAL NURSING DIRECT<br>CC     |     | Yes |     |     |  |
| NURSING AND MIDWIFERY      | NEONATAL NURSING<br>INDIRECT CC   |     | Yes |     |     |  |
| NURSING AND MIDWIFERY      | NHS 24 NURSING                    | Yes |     |     |     |  |
| NURSING AND MIDWIFERY      | NURSING<br>TRAINING/ADMIN/MGT     |     |     |     |     |  |
| NURSING AND                | PAEDIATRIC NURSING                |     | Yes | Yes |     |  |

|                          |                                |     |     |     |  |  |
|--------------------------|--------------------------------|-----|-----|-----|--|--|
| MIDWIFERY                |                                |     |     |     |  |  |
| NURSING AND MIDWIFERY    | PRACTICE NURSING               |     | Yes |     |  |  |
| NURSING AND MIDWIFERY    | PUBLIC HEALTH NURSING          |     |     |     |  |  |
| NURSING AND MIDWIFERY    | SCHOOL NURSING                 |     |     |     |  |  |
| NURSING AND MIDWIFERY    | SEXUAL AND REPRODUCTIVE HEALTH |     |     |     |  |  |
| NURSING AND MIDWIFERY    | SPECIALIST NURSING             |     | Yes |     |  |  |
| NURSING AND MIDWIFERY    | STAFF NURSERY                  |     |     |     |  |  |
| NURSING AND MIDWIFERY    | TREATMENT ROOM NURSING         |     | Yes |     |  |  |
| NURSING AND MIDWIFERY    | BANK NURSING                   |     | Yes |     |  |  |
| NURSING AND MIDWIFERY    | BTS NURSING                    |     | Yes | Yes |  |  |
| NURSING AND MIDWIFERY    | CARE OF THE ELDERLY NURSING    |     | Yes | Yes |  |  |
| NURSING AND MIDWIFERY    | COMMUNITY GENERAL NURSING      |     | Yes |     |  |  |
| NURSING AND MIDWIFERY    | DISTRICT NURSING               |     | Yes |     |  |  |
| NURSING AND MIDWIFERY    | FAMILY PLANNING NURSING        |     |     |     |  |  |
| NURSING AND MIDWIFERY    | GENERAL ACUTE NURSING          |     | Yes | Yes |  |  |
| NURSING AND MIDWIFERY    | HEALTH VISITOR NURSING         |     |     |     |  |  |
| NURSING AND MIDWIFERY    | LEARNING DISABILITIES NURSING  |     | Yes |     |  |  |
| NURSING AND MIDWIFERY    | MENTAL HEALTH NURSING          |     | Yes |     |  |  |
| NURSING AND MIDWIFERY    | MIDWIFERY                      |     | Yes |     |  |  |
| OTHER THERAPEUTIC        | GENETIC COUNSELLING            |     |     |     |  |  |
| OTHER THERAPEUTIC        | NA                             |     |     |     |  |  |
| OTHER THERAPEUTIC        | OPTOMETRY                      |     |     |     |  |  |
| OTHER THERAPEUTIC        | PHARMACY                       |     |     |     |  |  |
| OTHER THERAPEUTIC        | PHARMACY TECHNICIANS           | Yes |     |     |  |  |
| OTHER THERAPEUTIC        | PLAY SPECIALIST                |     | Yes |     |  |  |
| OTHER THERAPEUTIC        | PSYCHOLOGY                     |     |     |     |  |  |
| PERSONAL AND SOCIAL CARE | CARE AT HOME                   |     | Yes |     |  |  |
| PERSONAL AND SOCIAL CARE | HEALTH PROMOTION               |     |     |     |  |  |
| PERSONAL AND SOCIAL CARE | HOSPITAL CHAPLAINCY            |     |     |     |  |  |

|                          |                        |     |     |  |  |  |
|--------------------------|------------------------|-----|-----|--|--|--|
| PERSONAL AND SOCIAL CARE | RESIDENTIAL / DAY CARE |     | Yes |  |  |  |
| PERSONAL AND SOCIAL CARE | SOCIAL WORK            |     |     |  |  |  |
| SENIOR MANAGERS          | NA                     | Yes |     |  |  |  |
| SUPPORT SERVICES         | CATERING SERVICES      |     |     |  |  |  |
| SUPPORT SERVICES         | DOMESTIC SERVICES      |     |     |  |  |  |
| SUPPORT SERVICES         | ESTATES                |     |     |  |  |  |
| SUPPORT SERVICES         | GENERAL SERVICES       |     |     |  |  |  |
| SUPPORT SERVICES         | GROUNDS SERVICES       |     |     |  |  |  |
| SUPPORT SERVICES         | HOTEL SERVICES         |     |     |  |  |  |
| SUPPORT SERVICES         | LAUNDRY/LINEN SERVICES |     |     |  |  |  |
| SUPPORT SERVICES         | NA                     |     |     |  |  |  |
| SUPPORT SERVICES         | PORTERING SERVICES     |     | Yes |  |  |  |
| SUPPORT SERVICES         | SECURITY SERVICES      |     |     |  |  |  |
| SUPPORT SERVICES         | STERILE SERVICES       |     |     |  |  |  |
| SUPPORT SERVICES         | STORES SERVICES        |     |     |  |  |  |
| SUPPORT SERVICES         | TRANSPORT SERVICES     |     |     |  |  |  |
| UNALLOCATED / NOT KNOWN  | NA                     |     |     |  |  |  |
| UNALLOCATED / NOT KNOWN  | NOT KNOWN              |     |     |  |  |  |

#### Clinical nurse specialist Do not use for definitions

Retain description for information, but these definitions are under review. As such, the data in SWISS will not reflect accurate CNS staffing "on the ground" and these definitions should not be included in the project.

| <b>Clinical Nurse Speciality (CNS)</b> | <b>Patient-facing</b> | <b>Front-door</b> | <b>Resp-oral-nasal-AGP</b> |
|----------------------------------------|-----------------------|-------------------|----------------------------|
| Addictions                             |                       |                   |                            |
| Alcohol                                |                       |                   |                            |
| Anti-coagulant                         |                       |                   |                            |
| Asthma                                 | Yes                   |                   |                            |
| Blood Transfusion                      | Yes                   |                   |                            |
| Breast Care Nursing                    | Yes                   |                   |                            |
| Breast Feeding Co-ordinator            |                       |                   |                            |
| Burns                                  | Yes                   |                   |                            |
| Cancer                                 | Yes                   |                   |                            |
| Cancer – Breast                        | Yes                   |                   |                            |
| Cancer – Chemotherapy                  | Yes                   |                   |                            |
| Cancer – Colorectal                    | Yes                   |                   |                            |
| Cancer - Gynaecology Oncology          | Yes                   |                   |                            |
| Cancer – Haematology                   | Yes                   |                   |                            |
| Cancer - Head and Neck                 | Yes                   |                   |                            |
| Cancer – Lung                          | Yes                   |                   |                            |
| Cancer - Neuro-oncology                | Yes                   |                   |                            |

|                                       |     |     |     |
|---------------------------------------|-----|-----|-----|
| Cancer – Oncology                     | Yes |     |     |
| Cancer – Ophthalmic                   | Yes |     |     |
| Cancer – Other                        | Yes |     |     |
| Cancer - Radiotherapy and Oncology    | Yes |     |     |
| Cancer – Sarcoma                      | Yes |     |     |
| Cancer – Skin                         | Yes |     |     |
| Cancer - Upper GI                     | Yes |     |     |
| Cancer - Urology Oncology             | Yes |     |     |
| Cardiac Rehabilitation                |     |     |     |
| Cardiac Surgery                       | Yes |     |     |
| Cardiology                            | Yes |     |     |
| Challenging Behaviour                 |     |     |     |
| Child and Adolescent Mental Health    |     |     |     |
| Child Protection                      |     |     |     |
| Cognitive Behavioural Therapy         |     |     |     |
| Continence                            |     |     |     |
| Cystic Fibrosis                       | Yes |     | Yes |
| Deliberate Self Harm                  |     |     |     |
| Dermatology                           |     |     |     |
| Diabetes                              | Yes |     |     |
| Drugs                                 |     |     |     |
| Ear Nose and Throat                   | Yes |     | Yes |
| Emergency Medicine                    | Yes | Yes |     |
| Endocrinology                         | Yes |     |     |
| Epilepsy                              | Yes |     |     |
| Forensics                             |     |     |     |
| Gastro-intestinal                     | Yes |     |     |
| Genetic                               |     |     |     |
| Genitourinary Medicine                | Yes |     |     |
| Gynaecology                           | Yes |     |     |
| Haematology                           | Yes |     |     |
| HIV                                   |     |     |     |
| Hospital at Night                     | Yes |     |     |
| Infection Control                     | Yes |     |     |
| Mental Illness                        |     |     |     |
| Midwifery                             | Yes |     |     |
| Midwifery - Fetal Medicine            | Yes |     |     |
| Midwifery - Special Needs in Medicine | Yes |     |     |
| Minor Injuries                        | Yes |     |     |
| Multiple Sclerosis                    | Yes |     |     |
| Neonatology                           | Yes |     |     |
| Neuroscience/Neurology                | Yes |     |     |
| Nutrition                             |     |     |     |
| Occupational Health and Safety        | Yes |     |     |

|                                  |     |  |     |
|----------------------------------|-----|--|-----|
| Older Peoples Care / Gerontology | Yes |  |     |
| Ophthalmic                       |     |  |     |
| Orthopaedics                     | Yes |  |     |
| Paediatric                       | Yes |  |     |
| Pain                             |     |  |     |
| Palliative                       | Yes |  |     |
| Parkinson's Disease              | Yes |  |     |
| Perinatal Mental Health          |     |  |     |
| Plastic Surgery                  | Yes |  |     |
| Renal                            | Yes |  |     |
| Respiratory                      | Yes |  | Yes |
| Resuscitation                    |     |  |     |
| Rheumatology                     | Yes |  |     |
| Severe and Enduring Illness      |     |  |     |
| Sexual Health/Family Planning    |     |  |     |
| Smoking Cessation                |     |  |     |
| Stoma                            |     |  |     |
| Stroke                           | Yes |  |     |
| Substance Misuse                 |     |  |     |
| Tissue Viability                 |     |  |     |
| Urological                       | Yes |  |     |
| Vascular                         | Yes |  |     |
| Other - please specify           |     |  |     |

### Service areas

| service_area                         | Front-door | Resp-oral-nasal-AGP | Intensive care |
|--------------------------------------|------------|---------------------|----------------|
| Accident and Emergency               | Yes        |                     |                |
| Anaesthetics                         |            |                     | Yes            |
| Anatomical Pathology                 |            |                     |                |
| Audiological Medicine                |            |                     |                |
| Bank Management                      |            |                     |                |
| Biochemistry                         |            |                     |                |
| Biomedical Science                   |            |                     |                |
| Breast Screening                     |            |                     |                |
| Cancer                               |            |                     |                |
| Cardiac                              |            |                     |                |
| Clinical Audit                       |            |                     |                |
| Clinical Genetics                    |            |                     |                |
| Clinical Oncology                    |            |                     |                |
| Clinical Pathology                   |            |                     |                |
| Clinical Pharmacology & Therapeutics |            |                     |                |
| Clinical Radiology (Diagnostic)      |            |                     |                |

|                                           |     |     |     |
|-------------------------------------------|-----|-----|-----|
| Combination                               |     |     |     |
| Communications                            |     |     |     |
| Counselling                               |     |     |     |
| Criminal Justice/Police Custody           |     |     |     |
| Dermatology                               |     |     |     |
| Ear Nose & Throat                         |     | Yes |     |
| Endocrinology & Diabetes                  |     |     |     |
| Facilities                                |     |     |     |
| Family Planning Service                   |     |     |     |
| Fixed And Removable Prosthodontics        |     |     |     |
| Forensic Psychiatry                       |     |     |     |
| Gastroenterology                          |     |     |     |
| General Dental Practice                   |     | Yes |     |
| General Medicine                          | Yes |     |     |
| General Practice                          |     |     |     |
| General Psychiatry                        |     |     |     |
| General Surgery                           |     |     |     |
| Genito-Urinary Medicine                   |     |     |     |
| Gynaecology                               |     |     |     |
| Haematology                               |     |     |     |
| Health and Safety                         |     |     |     |
| Health Promotion                          |     |     |     |
| Health Protection Nurses                  |     |     |     |
| Histopathology                            |     |     |     |
| Homeless Services                         |     |     |     |
| Homeopathy                                |     |     |     |
| Hospital at Night                         |     |     |     |
| Immunology                                |     |     |     |
| Infection Control                         |     |     |     |
| Infectious Diseases                       | Yes |     |     |
| Intensive Care                            |     |     | Yes |
| Keep Well Type Initiatives                |     |     |     |
| Learning Disabilities                     |     |     |     |
| Medical Engineering                       |     |     |     |
| Medical Illustration                      |     |     |     |
| Medical Microbiology & Virology           |     |     |     |
| Medical Records                           |     |     |     |
| Microbiology                              |     |     |     |
| Midwifery Direct Clinical Care            |     |     |     |
| Midwifery Indirect Clinical Care          |     |     |     |
| NA                                        |     |     |     |
| Neonatal Midwifery Direct Clinical Care   |     |     |     |
| Neonatal Midwifery Indirect Clinical Care |     |     |     |
| Neonatal Nursing Direct Clinical Care     |     |     |     |

|                                               |  |     |     |
|-----------------------------------------------|--|-----|-----|
| Neonatal Nursing Indirect Clinical Care       |  |     |     |
| Neonatal/SCBU                                 |  |     | Yes |
| Neuroscience                                  |  |     |     |
| Nuclear Medicine                              |  |     |     |
| Obstetrics                                    |  |     |     |
| Occupational Medicine                         |  |     |     |
| Ophthalmology                                 |  |     |     |
| Oral & Maxillofacial                          |  | Yes |     |
| Oral Medicine                                 |  |     |     |
| Oral Surgery                                  |  |     |     |
| Orthodontics                                  |  |     |     |
| Out of Hours                                  |  |     |     |
| Pain Management                               |  |     |     |
| Pathology                                     |  |     |     |
| Payroll                                       |  |     |     |
| Pharmacy                                      |  |     |     |
| Phlebotomy                                    |  |     |     |
| Physiology                                    |  |     |     |
| Planning                                      |  |     |     |
| Plastic Surgery                               |  |     |     |
| Psychotherapy                                 |  |     |     |
| Public Health Medicine                        |  |     |     |
| Radiology                                     |  |     |     |
| Rehabilitation                                |  |     |     |
| Renal                                         |  |     |     |
| Reproductive                                  |  |     |     |
| Research and Development                      |  |     |     |
| Respiratory                                   |  | Yes |     |
| Restorative Dentistry                         |  | Yes |     |
| Rheumatology                                  |  |     |     |
| Sexual Health                                 |  |     |     |
| Shops and Services                            |  |     |     |
| Smoking Cessation                             |  |     |     |
| Social Care                                   |  |     |     |
| Specialist Public Health Initiatives          |  |     |     |
| Stroke                                        |  |     |     |
| Surgical Dentistry                            |  | Yes |     |
| Theatre Services                              |  |     |     |
| Training                                      |  |     |     |
| Trauma & Orthopaedic Surgery                  |  |     |     |
| Urology                                       |  |     |     |
| Vascular Surgery                              |  |     |     |
| Young Peoples Nurse/Healthy Lifestyle Focused |  |     |     |

## Appendix 2 – Notes on GPCD CHI seeding and household linkage

The following need to be considered when analysing households.

Household was generally estimated using the address as supplied in CHI. However, where the number of household members was above 6 we additionally defined households using a fuzzy match (ie allowing for some differences in spelling and capitalisation) on surname. The result of this additional criterion is that some GPs will be recorded as belonging to single person households when in fact they live in multi-person households.

3 records have no postcode recorded on the CHI database. They have been included along with their households as they match well enough solely on names and address text.

Many records have households where some or all members have hyphenated surnames (ordering and completeness variable). Other householders had just one element (or vice versa) of the hyphenated name, this group also contained a large number of non-residential addresses recorded on the CHI file (eg GP practices where many people have addresses recorded) resulting in large households. This was addressed by fuzzy matching surname and checking address move dates. A small number of GPs in this analysis appear to have their address listed as the practice address.

## Appendix 3 – Notes on TURAS/SWISS

- For doctors in training their Health Board is recorded as NHS Education Scotland. Therefore, NHS Education Scotland applies an algorithm to determine the Health Board of placement. This derived variable is supplied to PHS for all subsequent analysis. Similarly, where the specialty from doctors in training is available on the TURAS system it is taken from there. Otherwise it is taken from SWISS.
- Multiple serial monthly extracts are taken from SWISS and supplied to NES. These were joined to allow identification of all staff working for the NHS over the time period of interest.
- Ethnicity and “long-term condition” are “equality and diversity” fields not normally supplied to NHS Education Scotland as part of the database extract and so may need to be added later
- Some values in the agenda for change job family/sub-job family fields are rarely completed and so the apparent level of granularity from the data dictionary does not always reflect the true granularity
- NHS Education Scotland run a number of analyses to clean and transform the database for their own reports. These were applied prior to transfer of the data to PHS

## Appendix 4 – Data dictionary

This includes data items not defined elsewhere (eg on the SWISS or SMR01 manuals)

### GPCD

- HID is household level ID
- LEAD is the GP from the original file. (0 means household member)
- SERIAL\_NO is the original key from the GPCD data

## Appendix 5 – Note on testing

As part of the COVID-19 response, the UK government set-up Lighthouse lab which are non-NHS labs set-up rapidly in response to a need to increase testing capacity staffed from universities and industry. The results from these labs are not currently visible within NHS or Public Health Scotland systems. However, the policy in Scotland is that health and social care workers who require testing to clarify if they can return to work should always have had – and will continue to have – their tests processed by an NHS lab, NOT in a Lighthouse lab. To date, the Lighthouse lab has been used for other key workers, lower down the prioritisation matrix (not level 1a or 1b)

<https://www.gov.scot/publications/coronavirus-covid-19-getting-tested/pages/overview/>

## Appendix 6 – Definitions of comorbidities

The following R code shows how each comorbidity were defined.

```
##### IHD #####
## nitrates are BNF code 020601
ids.icd.IHD <- unique(diagnoses$ANON_ID[grepl("^I2[0-5]", diagnoses$ICD10)])
ids.bnf.IHD <- unique(scripts$ANON_ID[subscr(as.character(scripts$bnf_paragraph_code), 1, 6) == "020601" |
      substr(as.character(scripts$bnf_paragraph_code), 1, 6) == "020603"])
table(ids.bnf.IHD %in% ids.icd.IHD)
## procedure codes for CABG and PTCA
ids.procedures.IHD <- unique(procedures$ANON_ID[grepl("^K4[012349]|^K50", procedures$MAIN_OPERATION)])
ids.IHD <- unique(c(ids.icd.IHD, ids.bnf.IHD, ids.procedures.IHD))
cc.severe$IHD.any <- as.factor(as.integer(cc.severe$ANON_ID %in% ids.IHD))
##### other heart disease #####
## heart disease is I05 to I52
ids.icd.heart.other <- unique(diagnoses$ANON_ID[grepl("^I0[01256789]|^I1[0-5]|^I2[6-8]|^I3[0-9]|^I4[0-9]|^I5[0-2]",
      diagnoses$ICD10)])
ids.bnf.heart.other <-
  unique(scripts$ANON_ID[subscr(as.character(scripts$bnf_paragraph_code), 1, 4) == "0203"]) # anti-arrhythmics
table(ids.bnf.heart.other %in% ids.icd.heart.other)
ids.procedures.heart.other <- unique(procedures$ANON_ID[grepl("^K57", procedures$MAIN_OPERATION)])
ids.heart.other <- unique(c(ids.icd.heart.other, ids.bnf.heart.other, ids.procedures.heart.other))
cc.severe$heart.other.any <- as.factor(as.integer(cc.severe$ANON_ID %in% ids.heart.other))
##### other circulatory disease is I60 to I99
ids.icd.circulatory.other <-
  unique(diagnoses$ANON_ID[grepl("^I[6-9]|^Z95", diagnoses$ICD10)])
cc.severe$circulatory.other <-
  as.factor(as.integer(cc.severe$ANON_ID %in% ids.icd.circulatory.other))
##### chronic kidney disease #####
## this includes CKD stage 4
ids.icd.ckd <- unique(diagnoses$ANON_ID[grepl("^N18[45]|^Z49[0-2]|^Z94[02]",
      diagnoses$ICD10)])
```

```

ids.kidneytransplant <- unique(procedures$ANON_ID[grepl("^M01[1234589]",
      procedures$MAIN_OPERATION)])

table(ids.kidneytransplant %in% ids.icd.ckd)

ids.ckd.any <- unique(c(ids.icd.ckd, ids.kidneytransplant))

cc.severe$ckd.any <- as.factor(as.integer(cc.severe$ANON_ID %in% ids.ckd.any))

##### asthma and chronic lower respiratory disease #####

ids.icd.asthma <- unique(diagnoses$ANON_ID[grepl("^J4[56]", diagnoses$ICD10)])

ids.icd.chronresp <- unique(diagnoses$ANON_ID[grepl("^J4[012347]|^J6[0-9]|^J70|^J8[0-6]|^J9[0-9]|^G47\\.?.?",
      diagnoses$ICD10)])

ids.bnf.broncho <- unique(scrips$ANON_ID[as.integer(scrips$sectioncode) >= 301 &
      as.integer(scrips$sectioncode) <= 303])

table(ids.icd.asthma %in% ids.bnf.broncho)

table(ids.icd.chronresp %in% ids.bnf.broncho)

ids.oad.any <- unique(c(ids.icd.asthma, ids.icd.chronresp, ids.bnf.broncho))

cc.severe$oad.any <- as.factor(as.integer(cc.severe$ANON_ID %in% ids.oad.any))

##### Neurological disorders #####

## include all Nervous chapter except G40 "Episodic and Paroxysmal Disorders"
## Except G0 meningitis and encephalitis, and G5 local neuropathies
## also include F03 dementia NOS

ids.icd.neuro <- unique(diagnoses$ANON_ID[grepl("^F03|^G[1236789]", diagnoses$ICD10)])

ids.bnf.neuro <- unique(scrips$ANON_ID[as.integer(scrips$sectioncode) == 409 |
      as.integer(scrips$sectioncode) == 411])

table(ids.bnf.neuro %in% ids.icd.neuro)

## these drugs listed by HPS pharmacist as used for multiple sclerosis
## interferon beta 080204M, Glatiramer acetate 0802040U0, Natalizumab 0802040W0
## Dimethyl fumarate 0802040AK, Teriflunomide 0802040AL, Alemtuzumab 0802030
## no records in scrips for these drugs
## 526 records in scrips[substr(scrips$bnf_paragraph_code, 1, 5) == "08020", ]

ids.neuro.any <- unique(c(ids.icd.neuro, ids.bnf.neuro))

cc.severe$neuro.any <- as.factor(as.integer(cc.severe$ANON_ID %in% ids.neuro.any))

##### Liver disease #####

liver.grep.string <-
"^C22\\.?.?|^I85\\.?.?|^I98\\.?.?|^K70\\.?.?[234|^K71\\.?.?|^K72\\.?.?[019]|^K72\\.?.?[019|^K73|^K74\\.?.?[023456]|^K76\\.?.?|^R18"

table(grep(liver.grep.string, diagnoses$ICD10, value=TRUE))

ids.icd.liver <- unique(diagnoses$ANON_ID[grepl(liver.grep.string, diagnoses$ICD10)])

cc.severe$liver.any <- as.factor(as.integer(cc.severe$ANON_ID %in% ids.icd.liver))

##### Immunodeficiency and immunosuppression #####

## immune.any includes primary immunodeficiency and secondary immunosuppression

ids.icd.immune <- unique(diagnoses$ANON_ID[grepl("^B2[0-3|^D8[0-9]", diagnoses$ICD10)])

## 802 other immunomodulating drugs

```

```

## Methotrexate and chloroquine appear in musculoskeletal chapter
ids.bnf.immune <- unique(scripts$ANON_ID[as.integer(scripts$sectioncode) == 802 |
      as.integer(scripts$paracode) == 50301])
ids.immune.any <- unique(c(ids.icd.immune, ids.bnf.immune))
cc.severe$immune.any <- as.factor(as.integer(cc.severe$ANON_ID %in% ids.immune.any))
##### neoplasms #####
ids.icd.neoplasm <- unique(diagnoses$ANON_ID[grep("^C[0-9]|^D[0-4]", diagnoses$ICD10)])
ids.bnf.neoplasm <- unique(scripts$ANON_ID[as.integer(scripts$sectioncode) == 801])
ids.neoplasm.any <- unique(c(ids.icd.neoplasm, ids.bnf.neoplasm))
cc.severe$neoplasm.any <- as.factor(as.integer(cc.severe$ANON_ID %in% ids.neoplasm.any))
##### disorders of esophagus, stomach and duodenum #####
ids.esoph.stomach.duod <- unique(diagnoses$ANON_ID[grep("^K2[0-9]|^K3[01]", diagnoses$ICD10)])
cc.severe$esoph.stomach.duod <-
      as.factor(as.integer(cc.severe$ANON_ID %in% ids.esoph.stomach.duod))

```
